# Supplementary material for: Synthesis and immunochemical evaluation of a novel Neisseria meningitidis serogroup A tetrasaccharide and its conjugate
Source: Royal Society of Chemistry journal article supplement (doi:10.1039/c7qo00468k), 2017-01-01
Supplement: c7qo00468k1.pdf [file c7qo00468k1.pdf]

## Synthesis and immunochemical evaluation of a novel *Neisseria meningitidis* serogroup A tetrasaccharide and its conjugate

Kishor R. Harale,<sup>a</sup> Jeetendra K. Rout,<sup>a</sup> Manoj Kumar Chhikara,<sup>a\*</sup> Davinder S. Gill,<sup>a</sup> Anup Kumar Misra<sup>b</sup>

### Supporting Information

#### Table of contents:

|                                              |       |
|----------------------------------------------|-------|
| 1) Copies of the 1D, 2D NMR and Mass spectra | S2-S4 |
| 2) Conjugate preparation protocol            | S46   |

$^1\text{H}$ NMR of compound **9** ( $\text{CDCl}_3$ , 500 MHz)

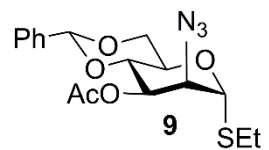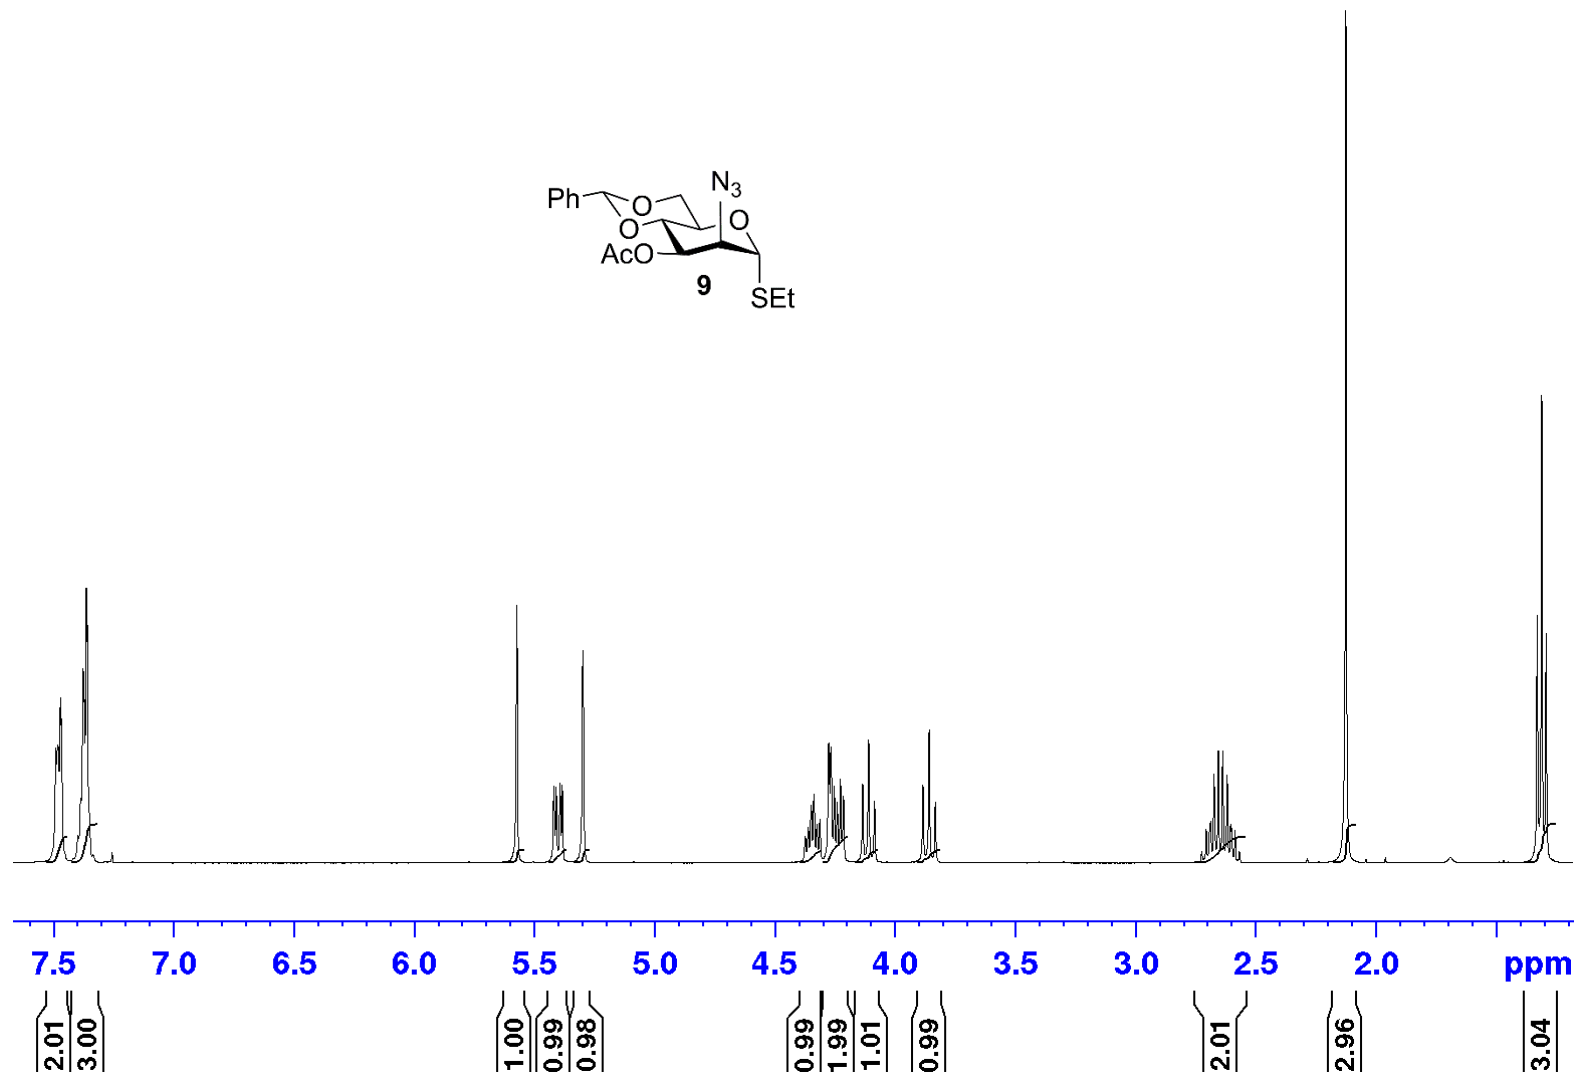

$^{13}\text{C}$ NMR of compound **9** ( $\text{CDCl}_3$ , 125 MHz)

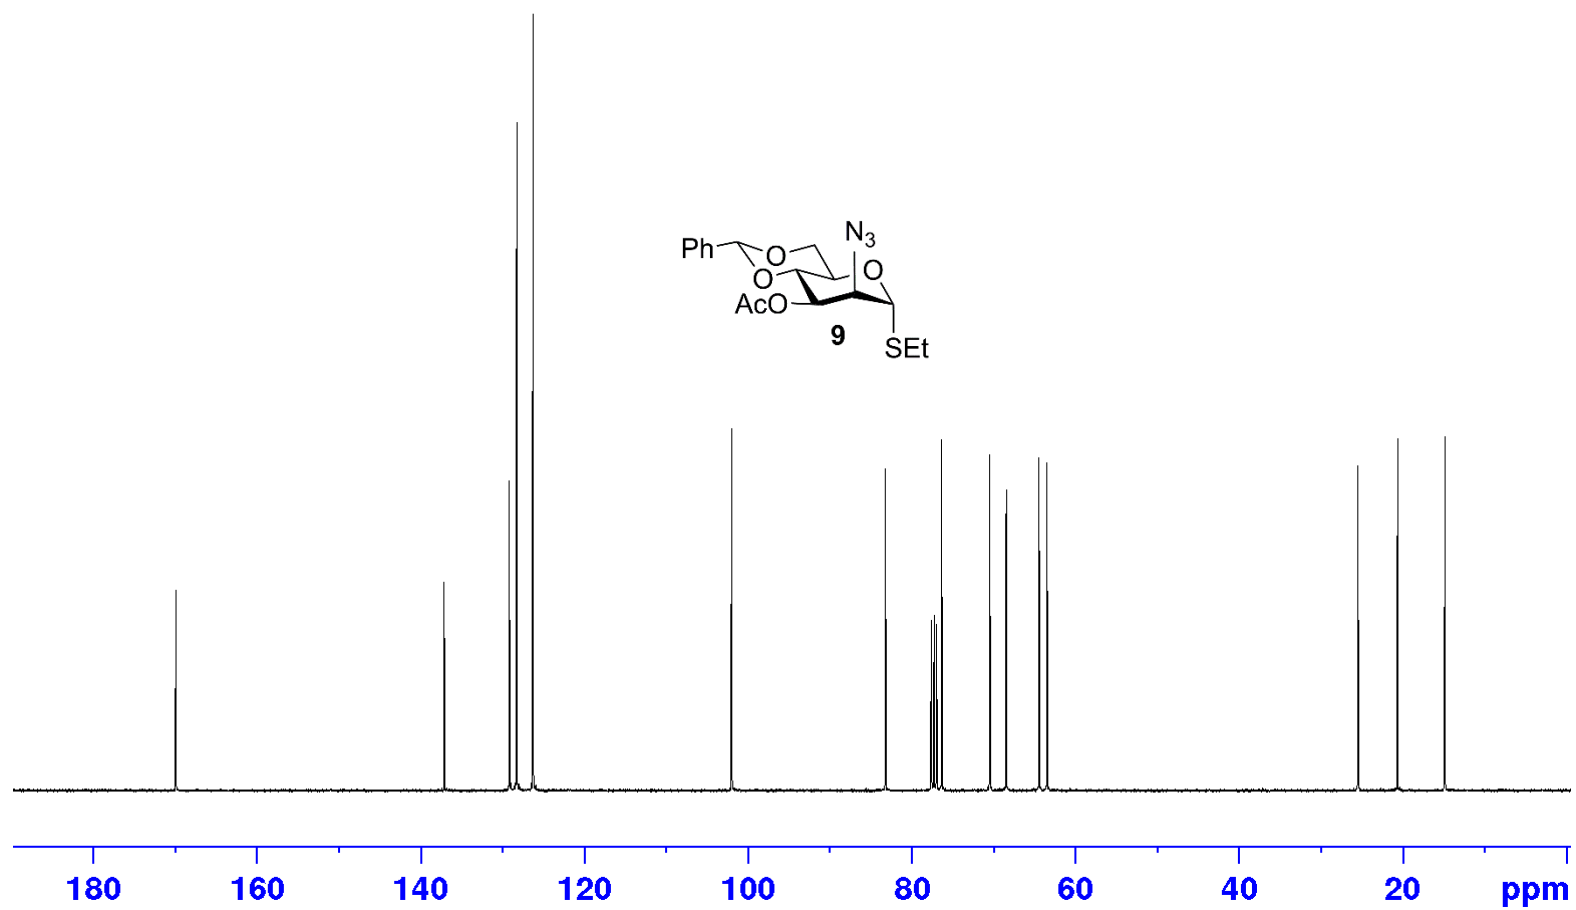

MALDI-TOF MS spectra of compound **9**

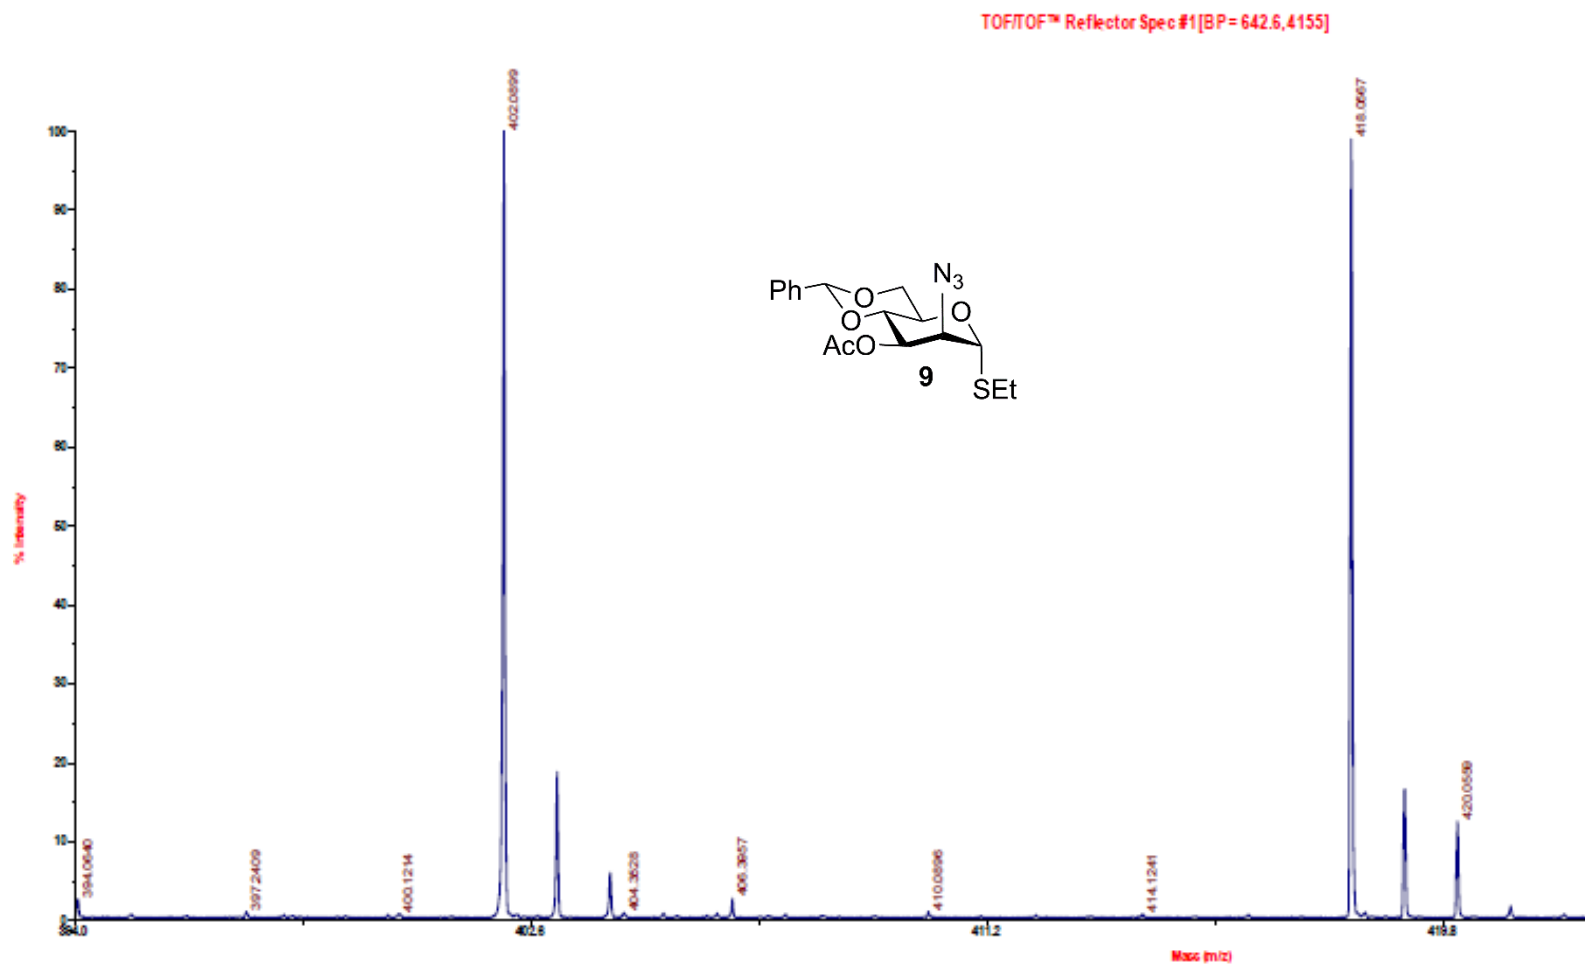

$^1\text{H}$ NMR of compound **4** ( $\text{CDCl}_3$ , 500 MHz)

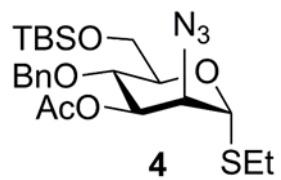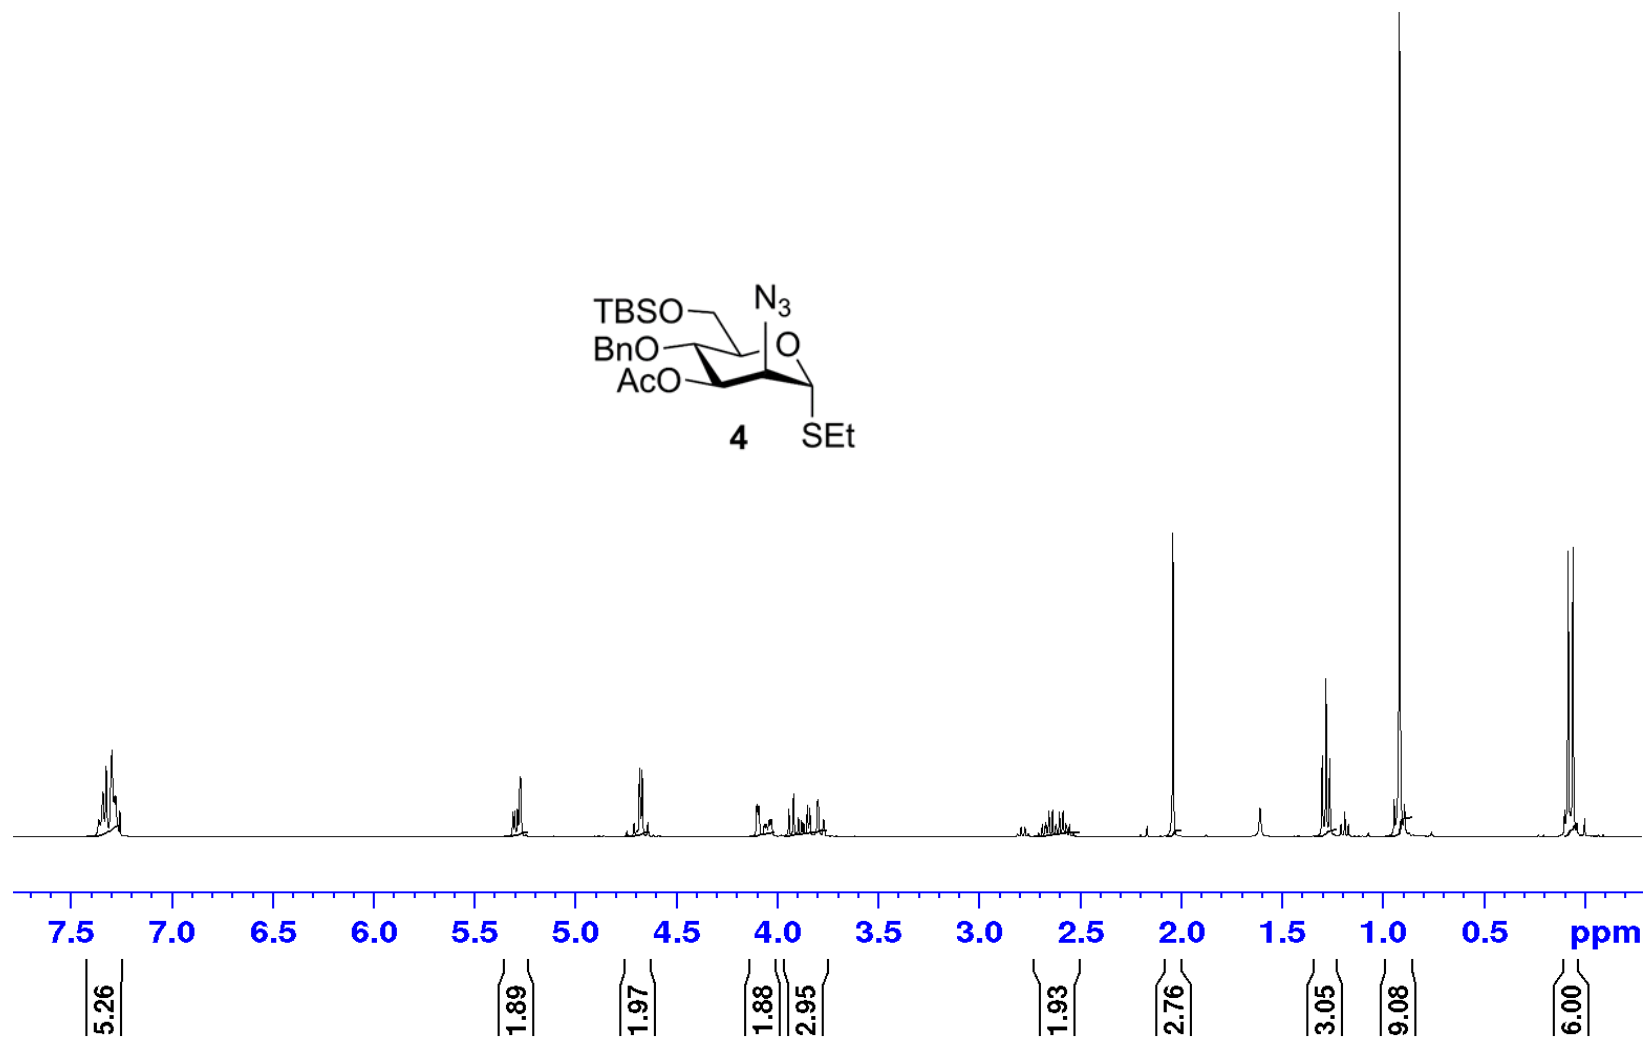

$^{13}\text{C}$  NMR of compound **4** ( $\text{CDCl}_3$ , 125 MHz)

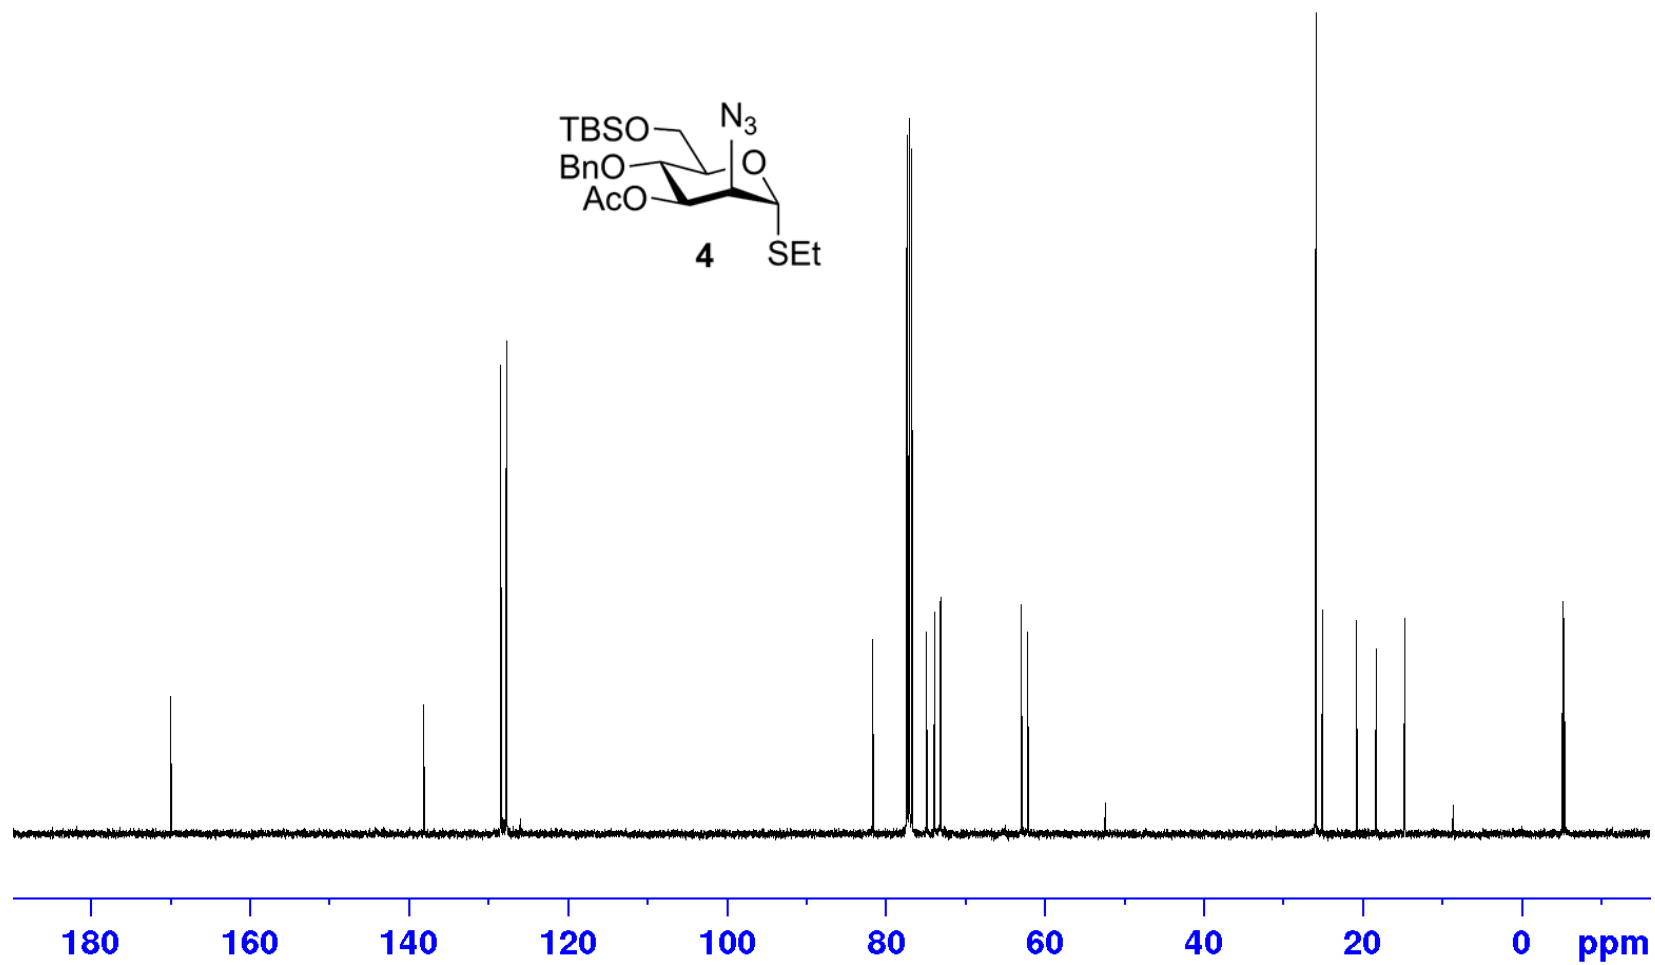

MALDI-TOF MS spectra of compound **4**

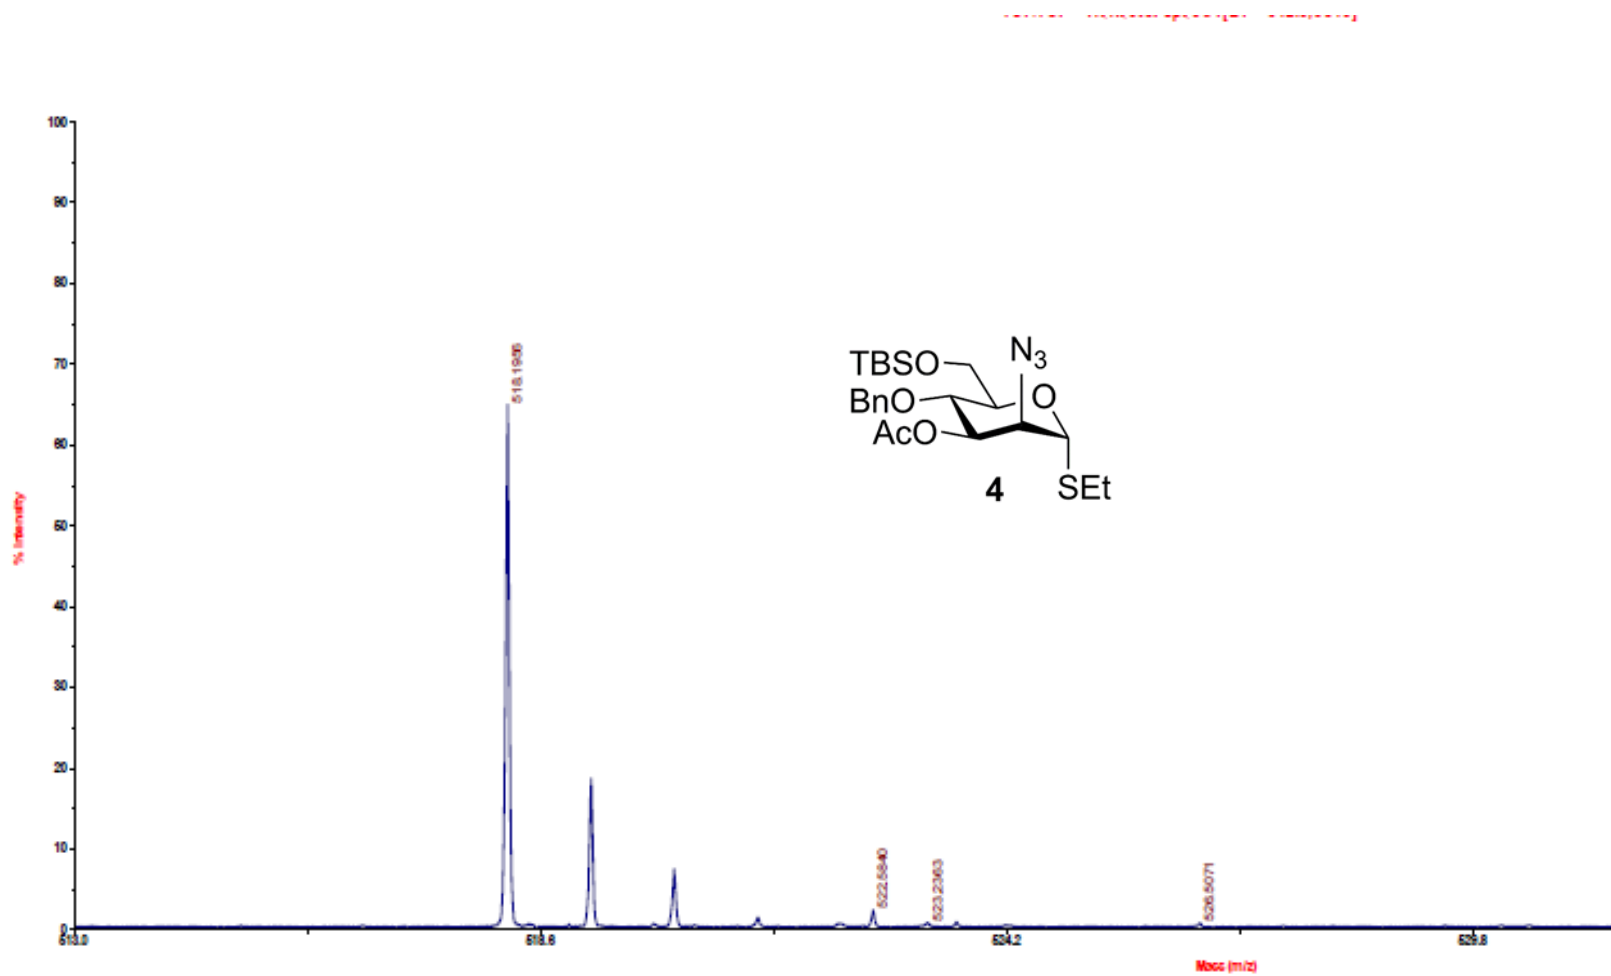

$^1\text{H}$ NMR of compound **3** ( $\text{CDCl}_3$ , 500 MHz)

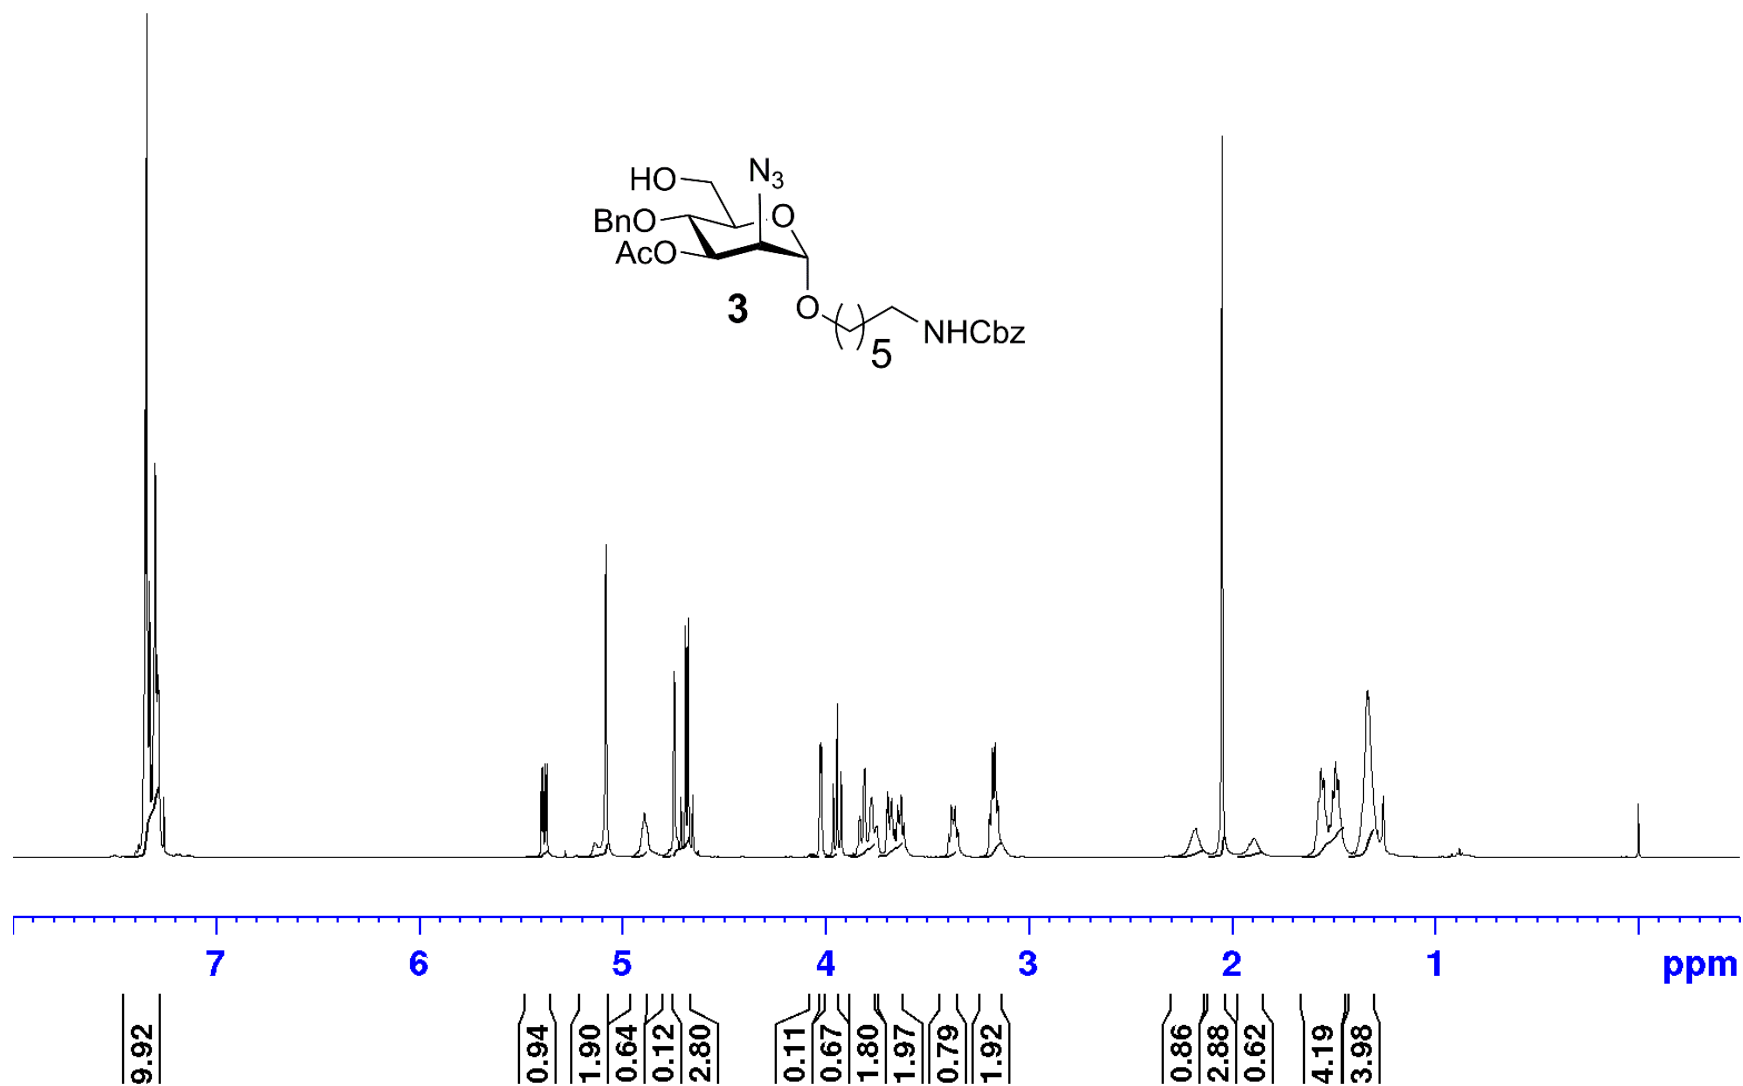



$^{13}\text{C}$  NMR of compound **3** ( $\text{CDCl}_3$ , 125 MHz)

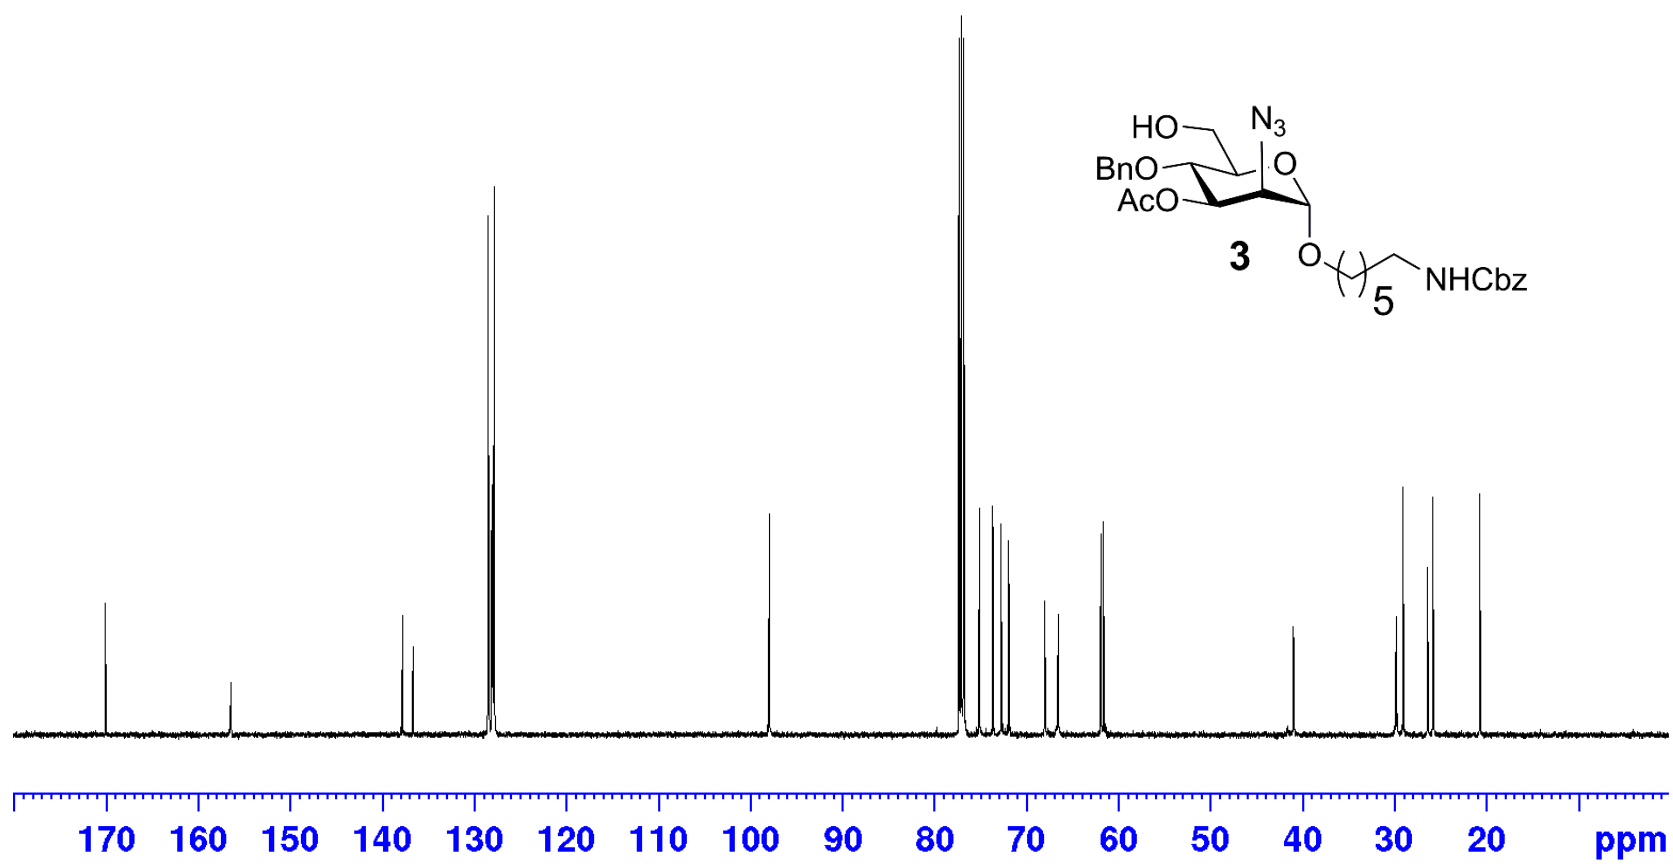

2D COSY of compound **3** (CDCl<sub>3</sub>, 500 MHz)

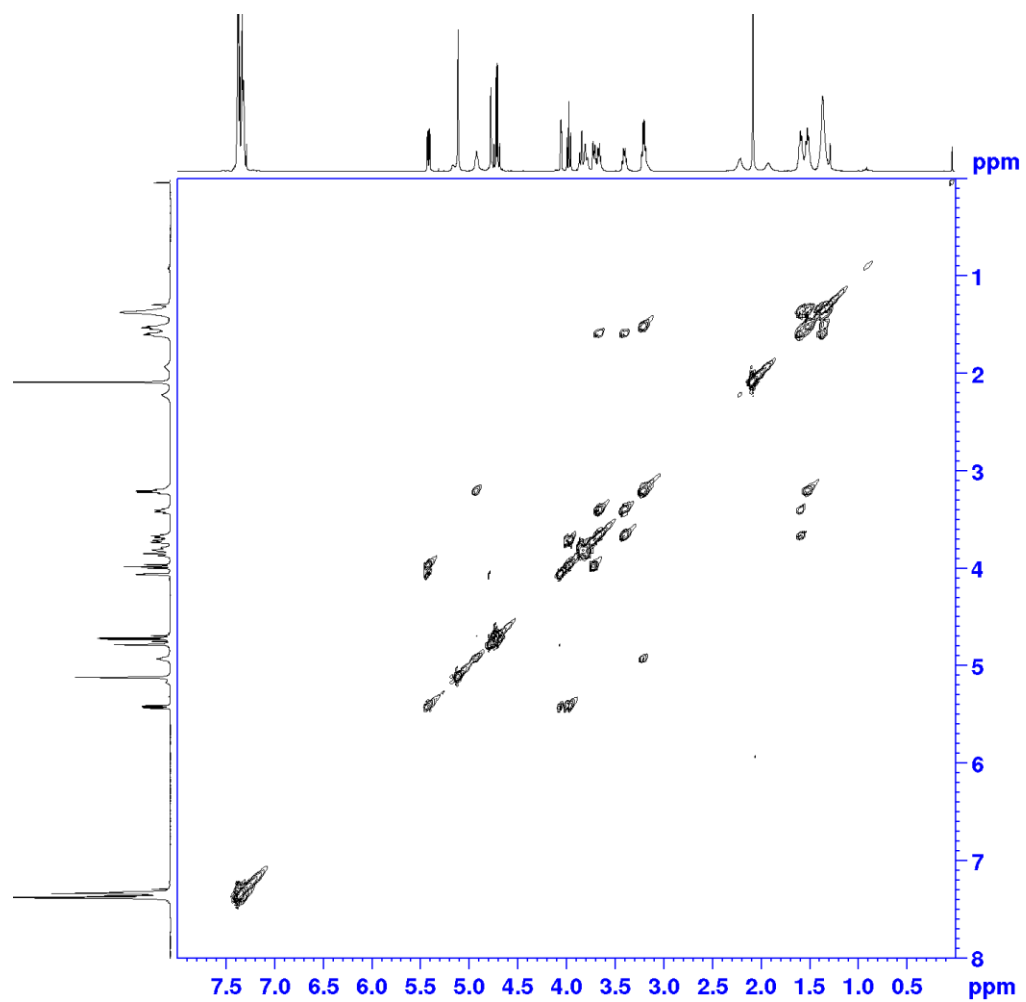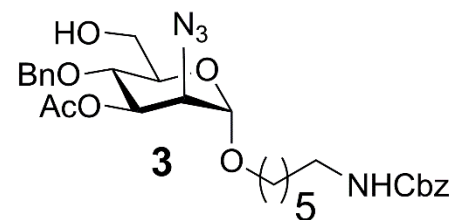

2D HSQC of compound **3** (CDCl<sub>3</sub>, 500 MHz)

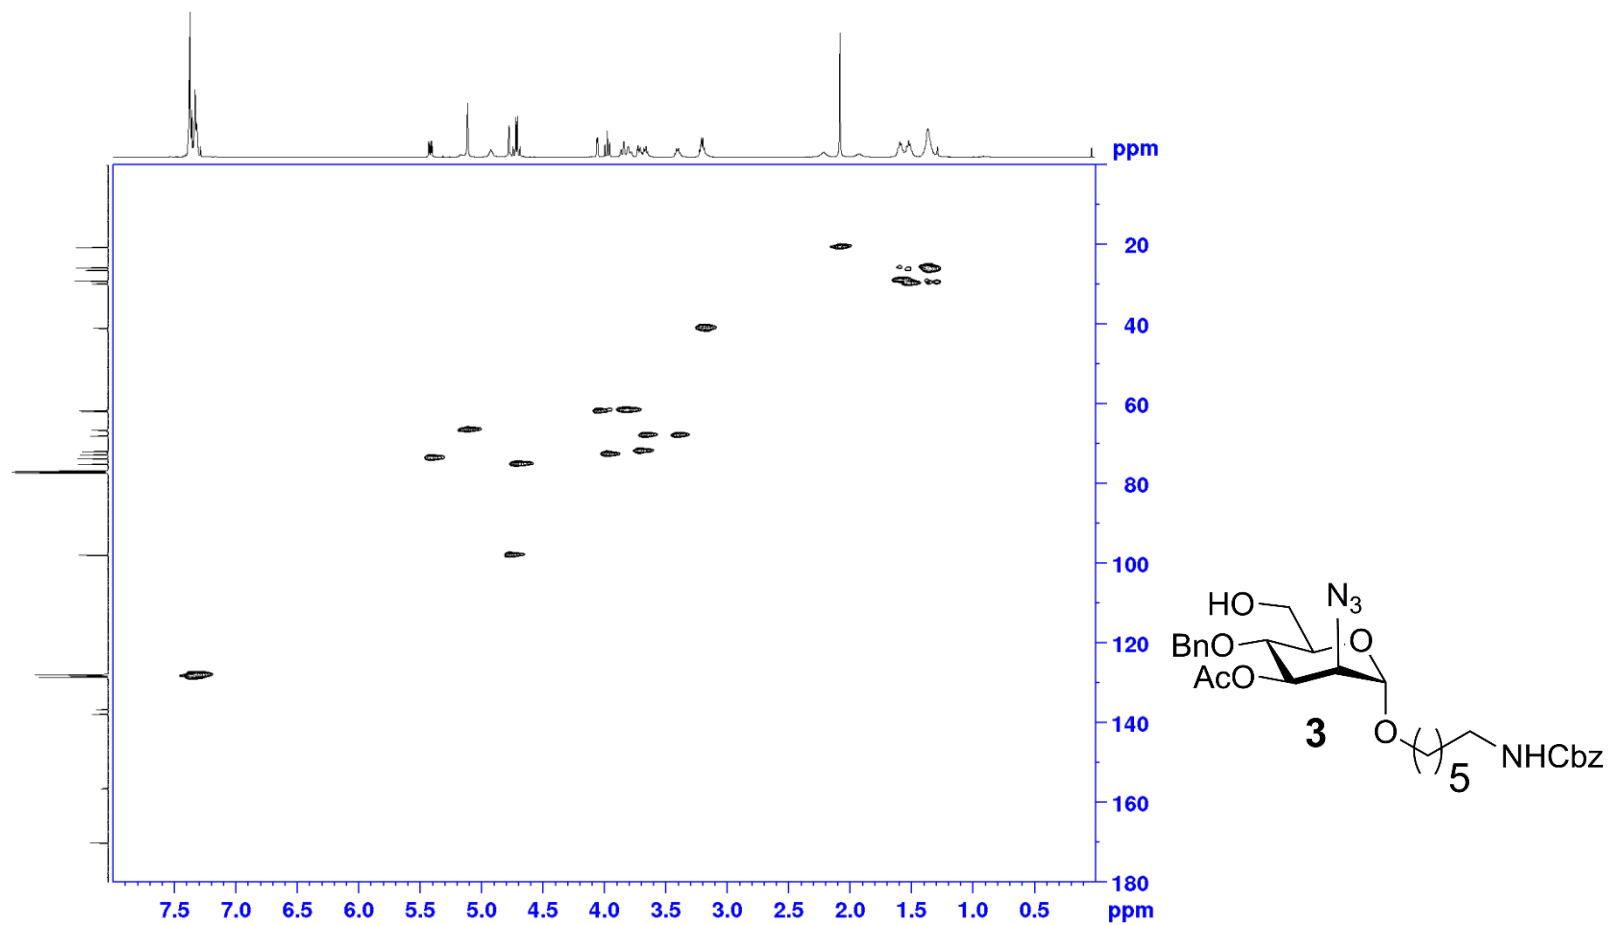

# MALDI-TOF MS spectra of compound 3

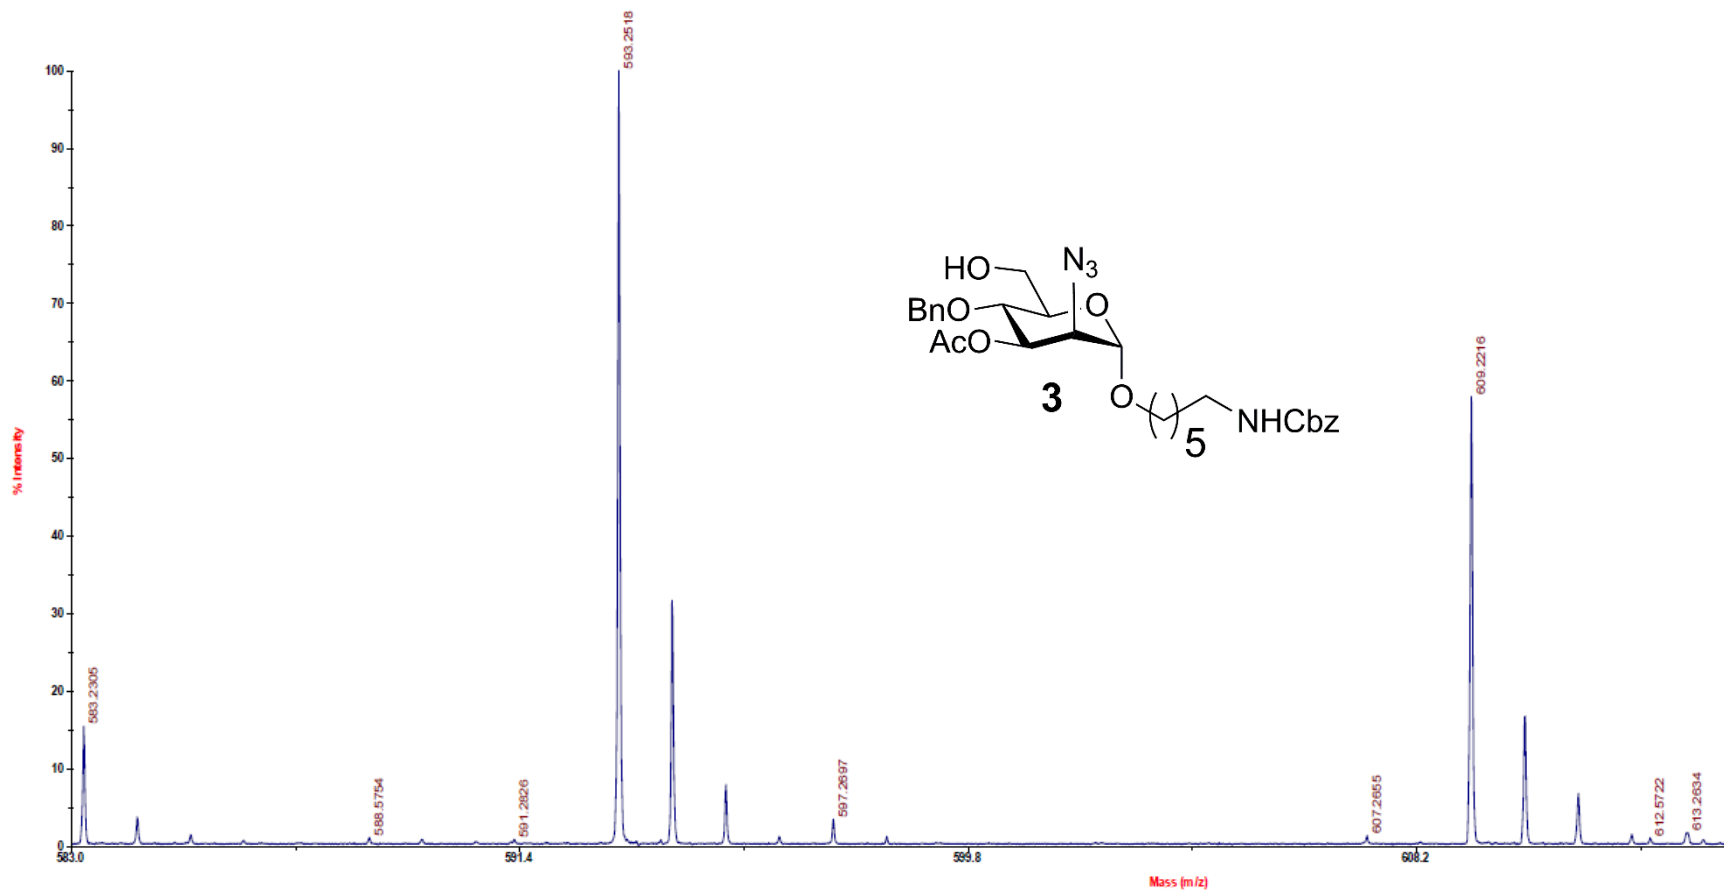

<sup>1</sup>H NMR of compound **11** (CDCl<sub>3</sub>, 500 MHz)

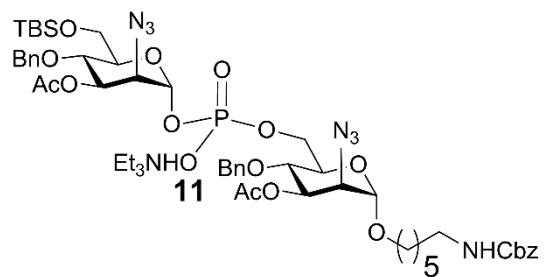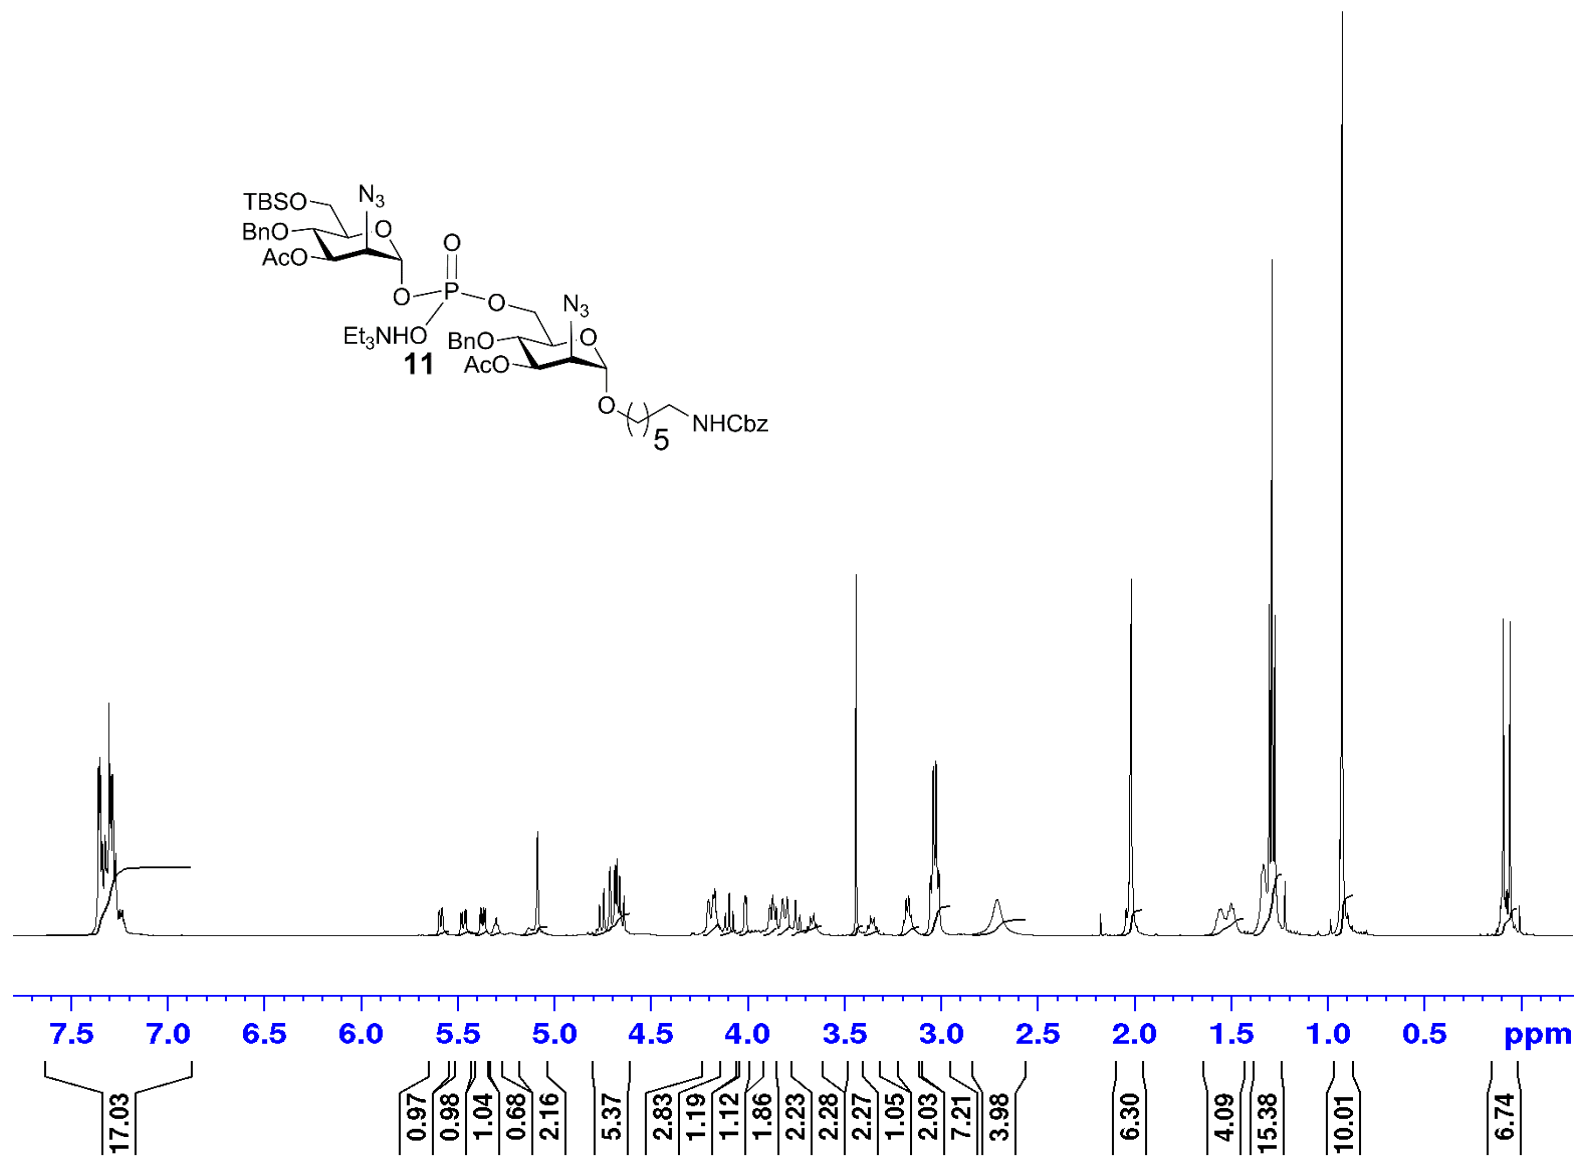

$^{13}\text{C}$  NMR of compound **11** ( $\text{CDCl}_3$ , 125 MHz)

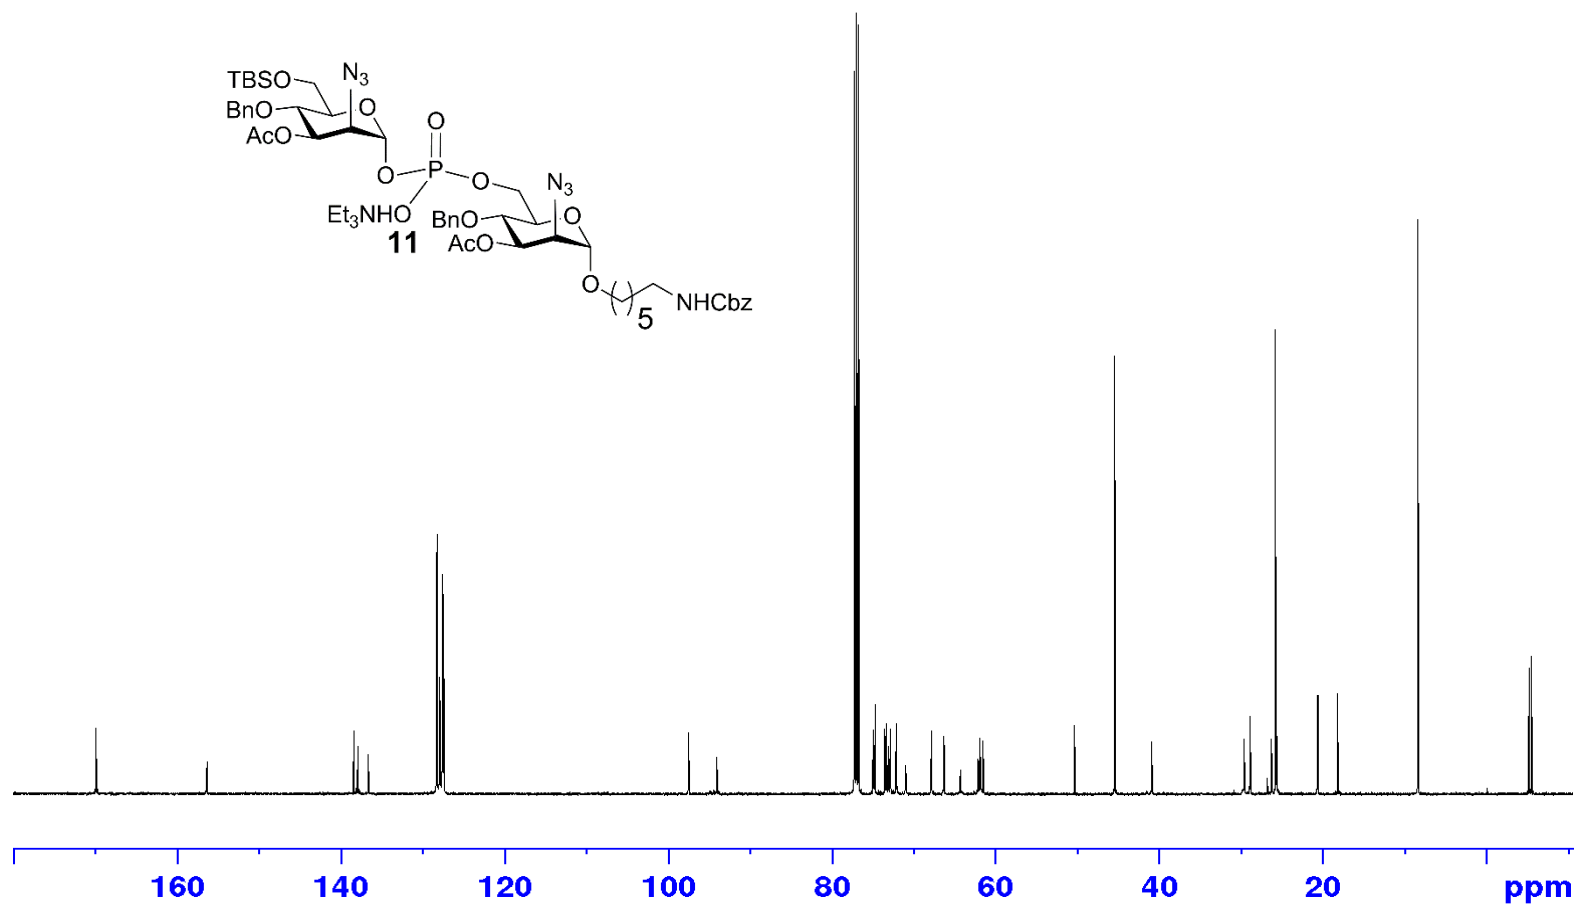

2D COSY of compound **11** (CDCl<sub>3</sub>, 500 MHz)

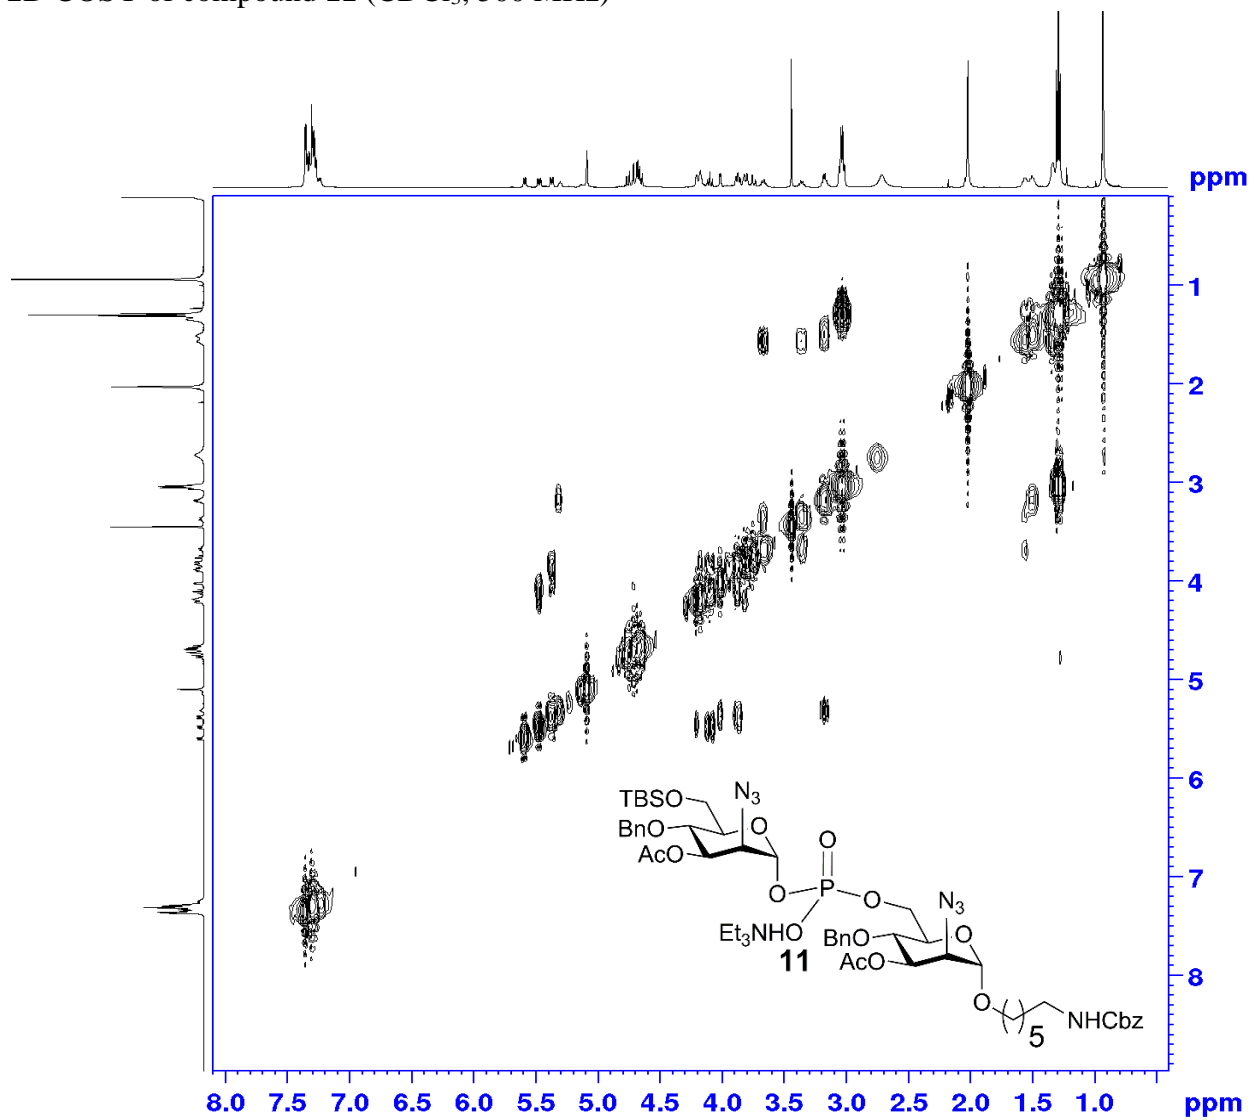

MALDI-TOF MS spectra of compound **11**

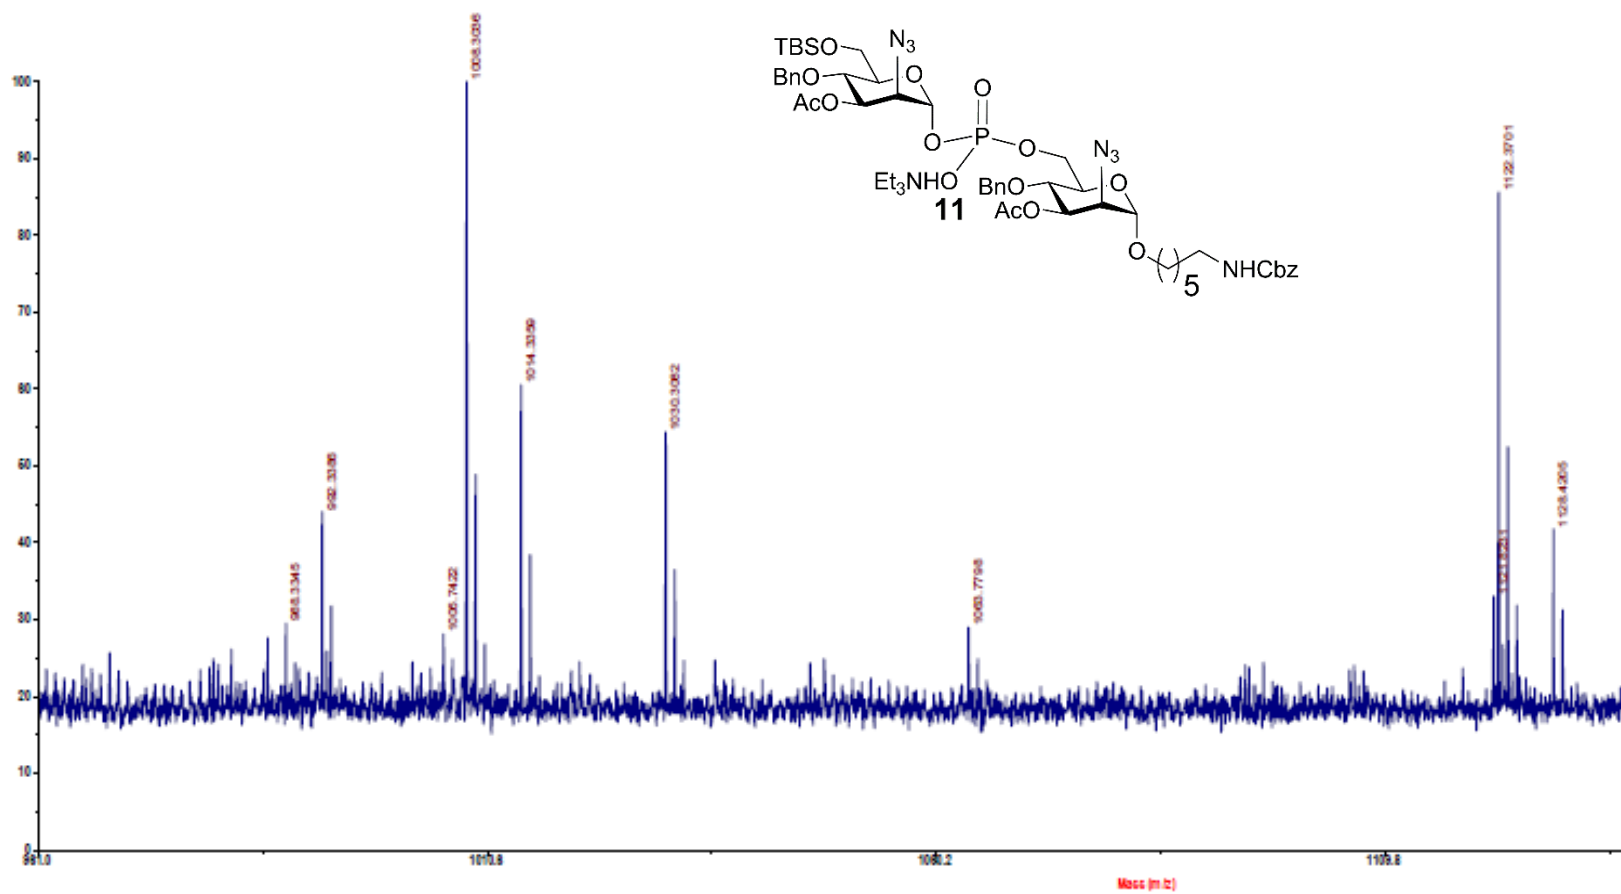



$^1\text{H}$ NMR of compound **12** ( $\text{CDCl}_3$ , 500 MHz)

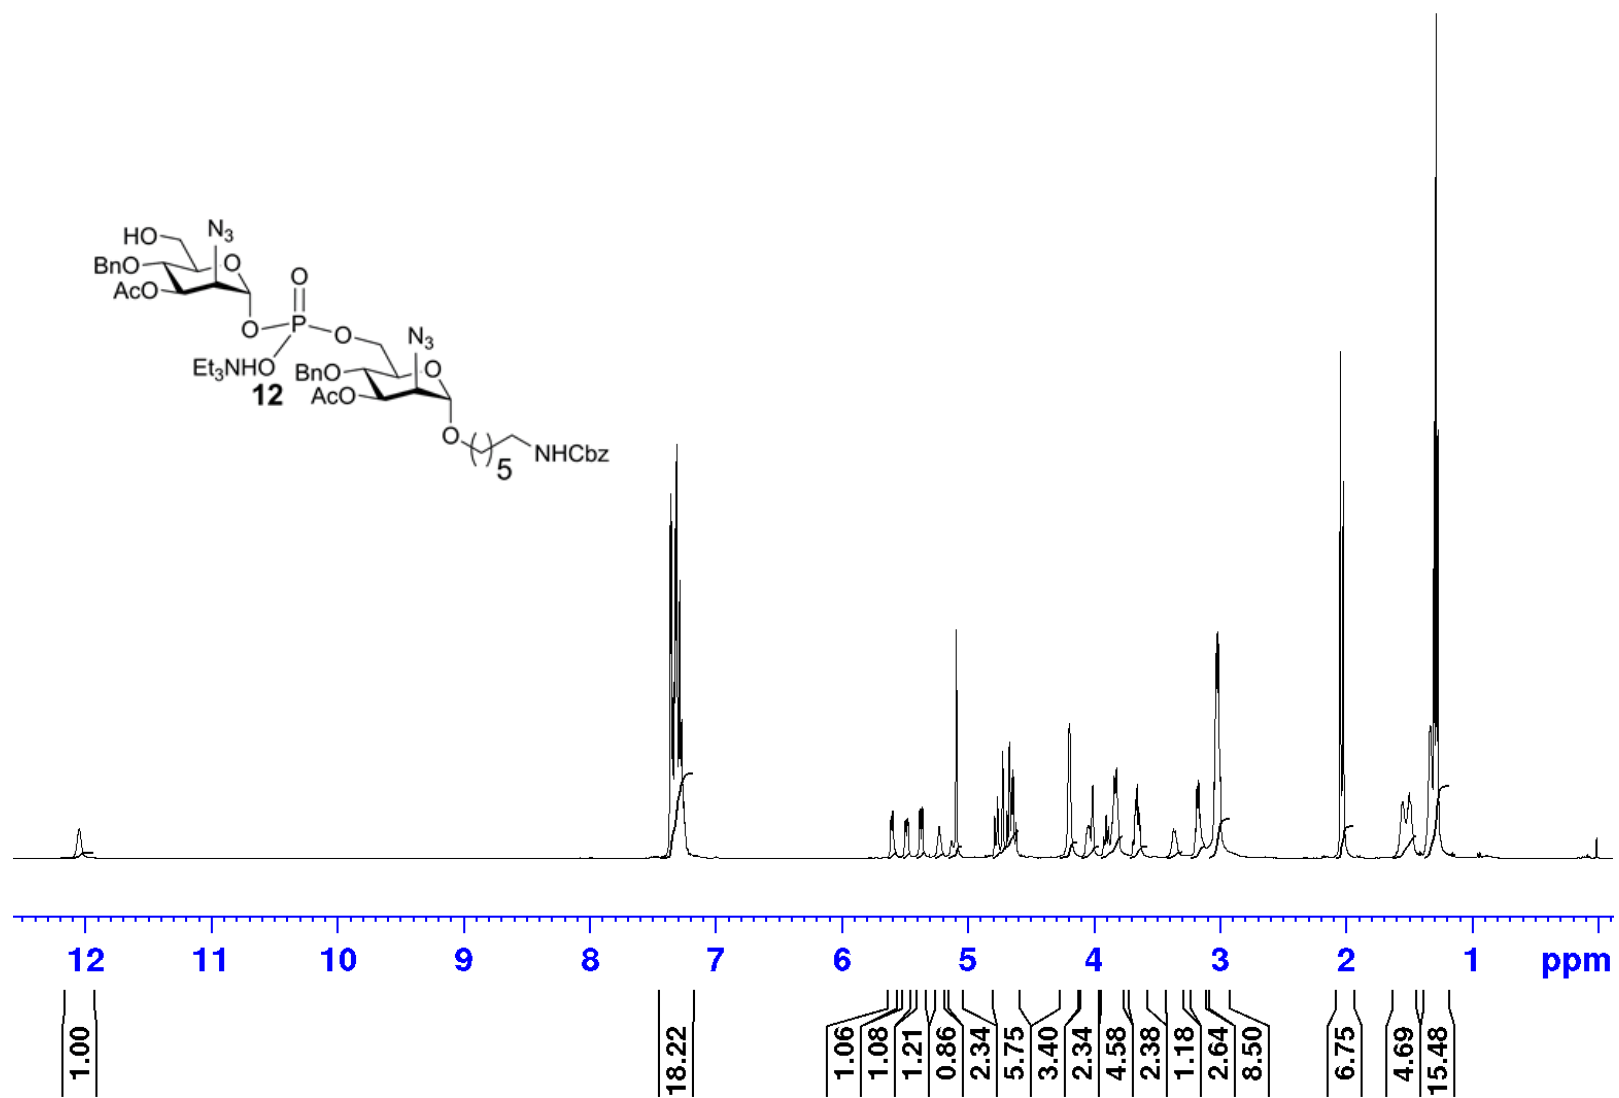

$^{13}\text{C}$  NMR of compound **12** ( $\text{CDCl}_3$ , 125 MHz)

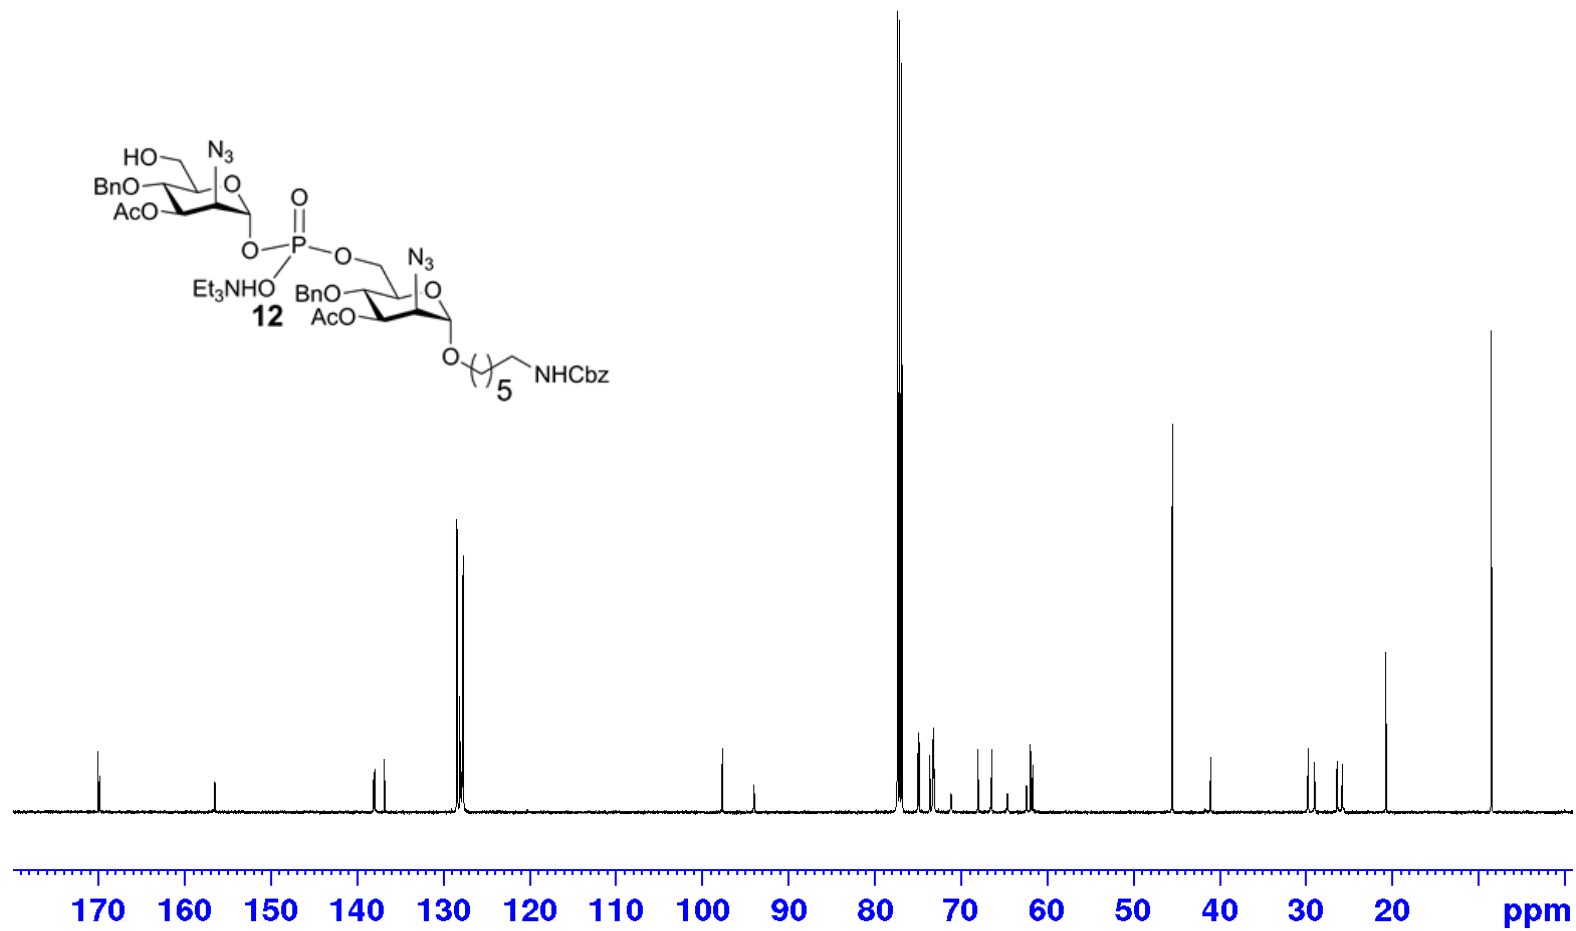

2D COSY of compound **12** (CDCl<sub>3</sub>, 500 MHz)

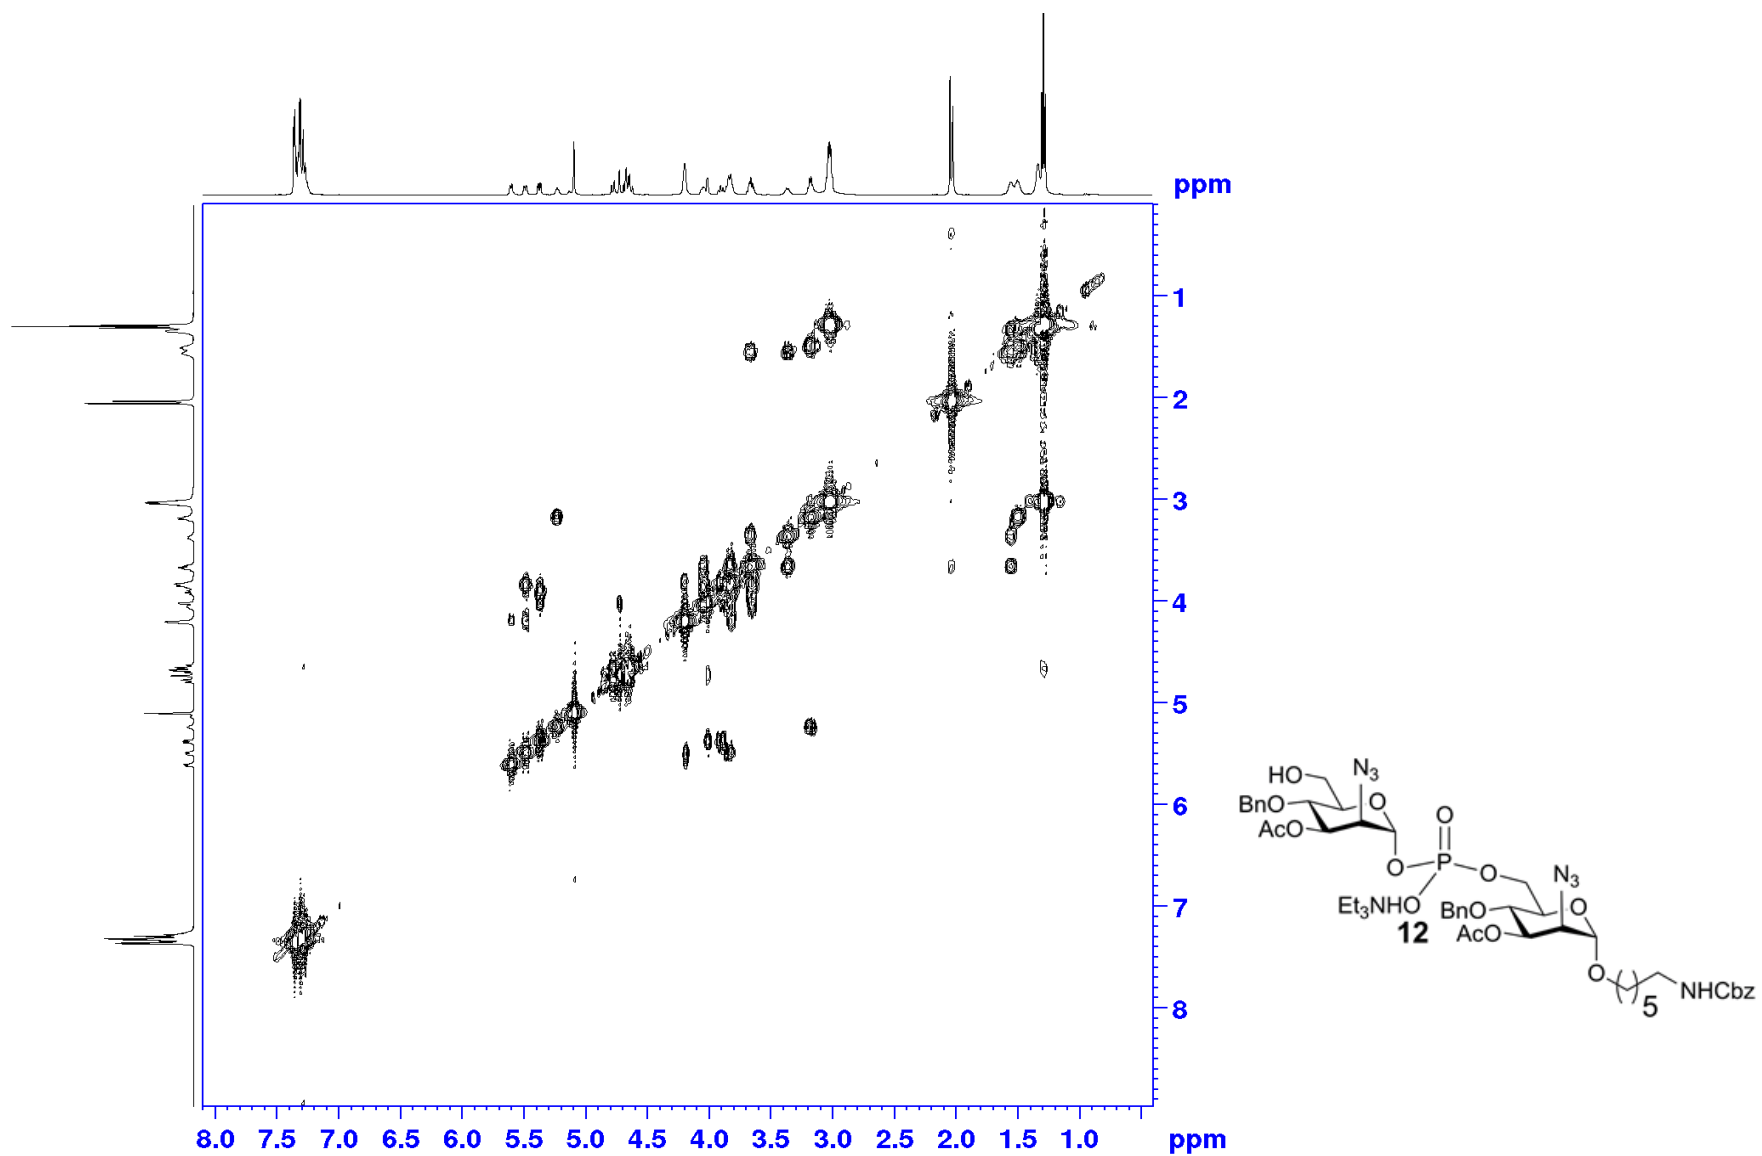

2D HSQC of compound **12** (CDCl<sub>3</sub>, 500 MHz)

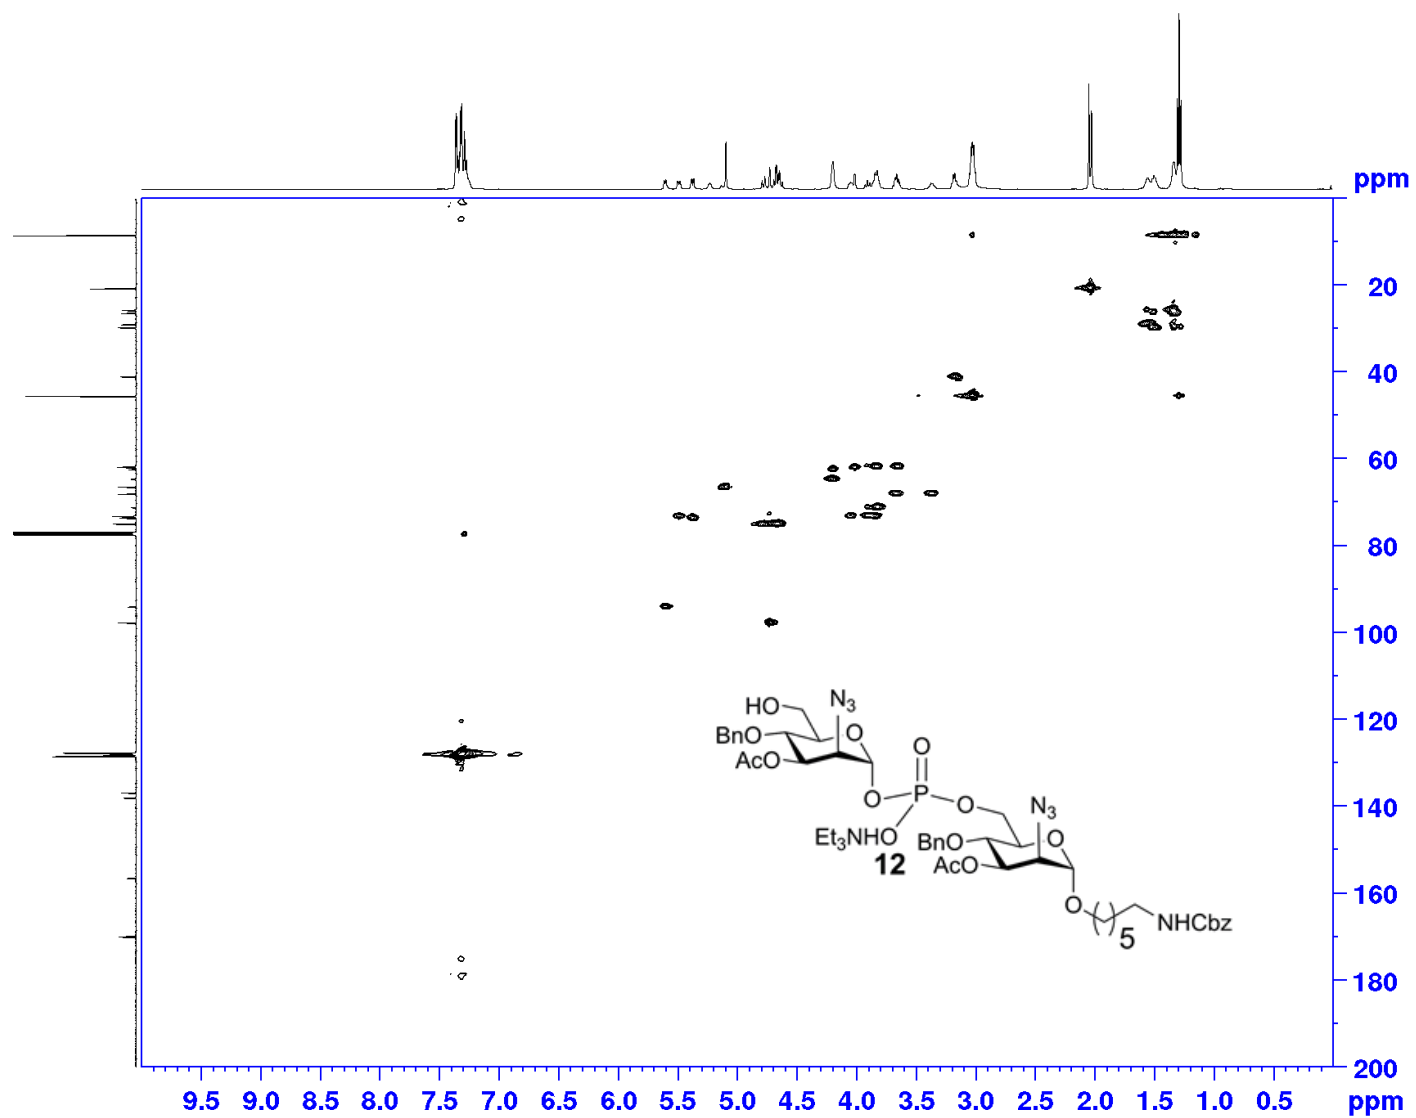

$^{31}\text{P}$  NMR of compound **12** ( $\text{CDCl}_3$ , 202 MHz)

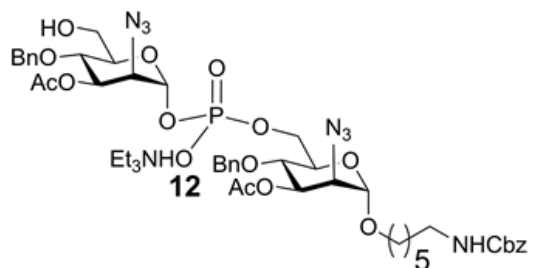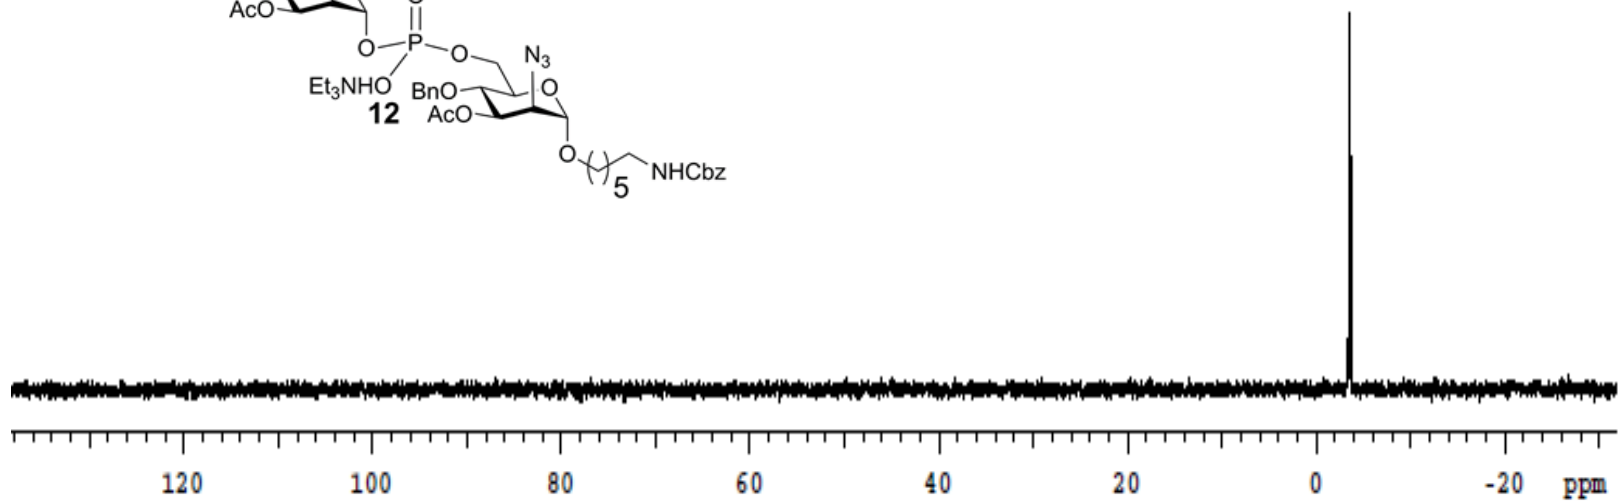

MALDI-TOF MS spectra of compound **12**

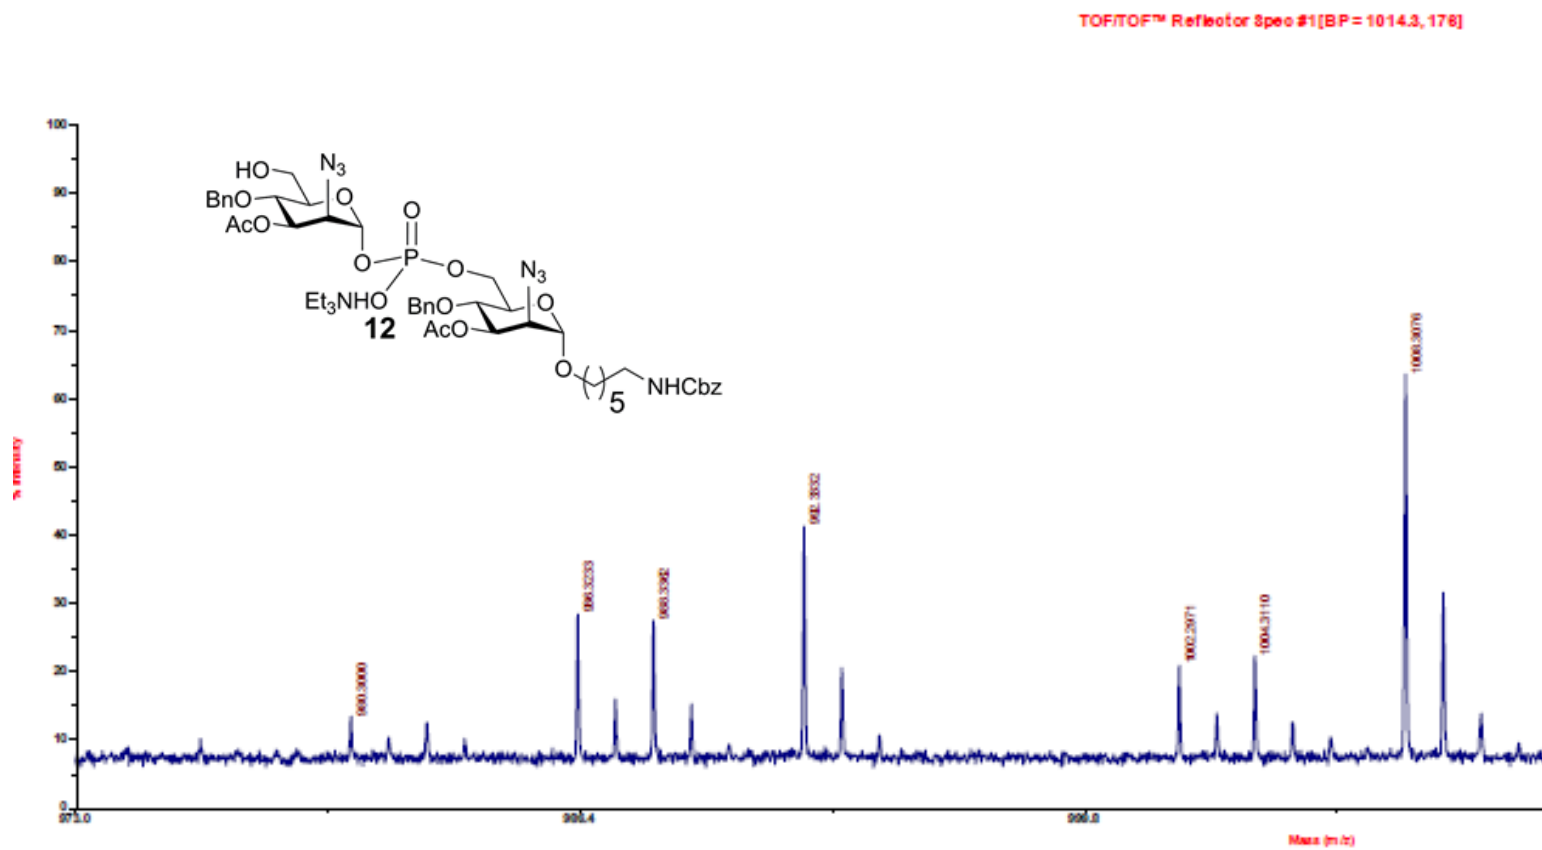

$^1\text{H}$ NMR of compound **13** ( $\text{CDCl}_3$ , 500 MHz)

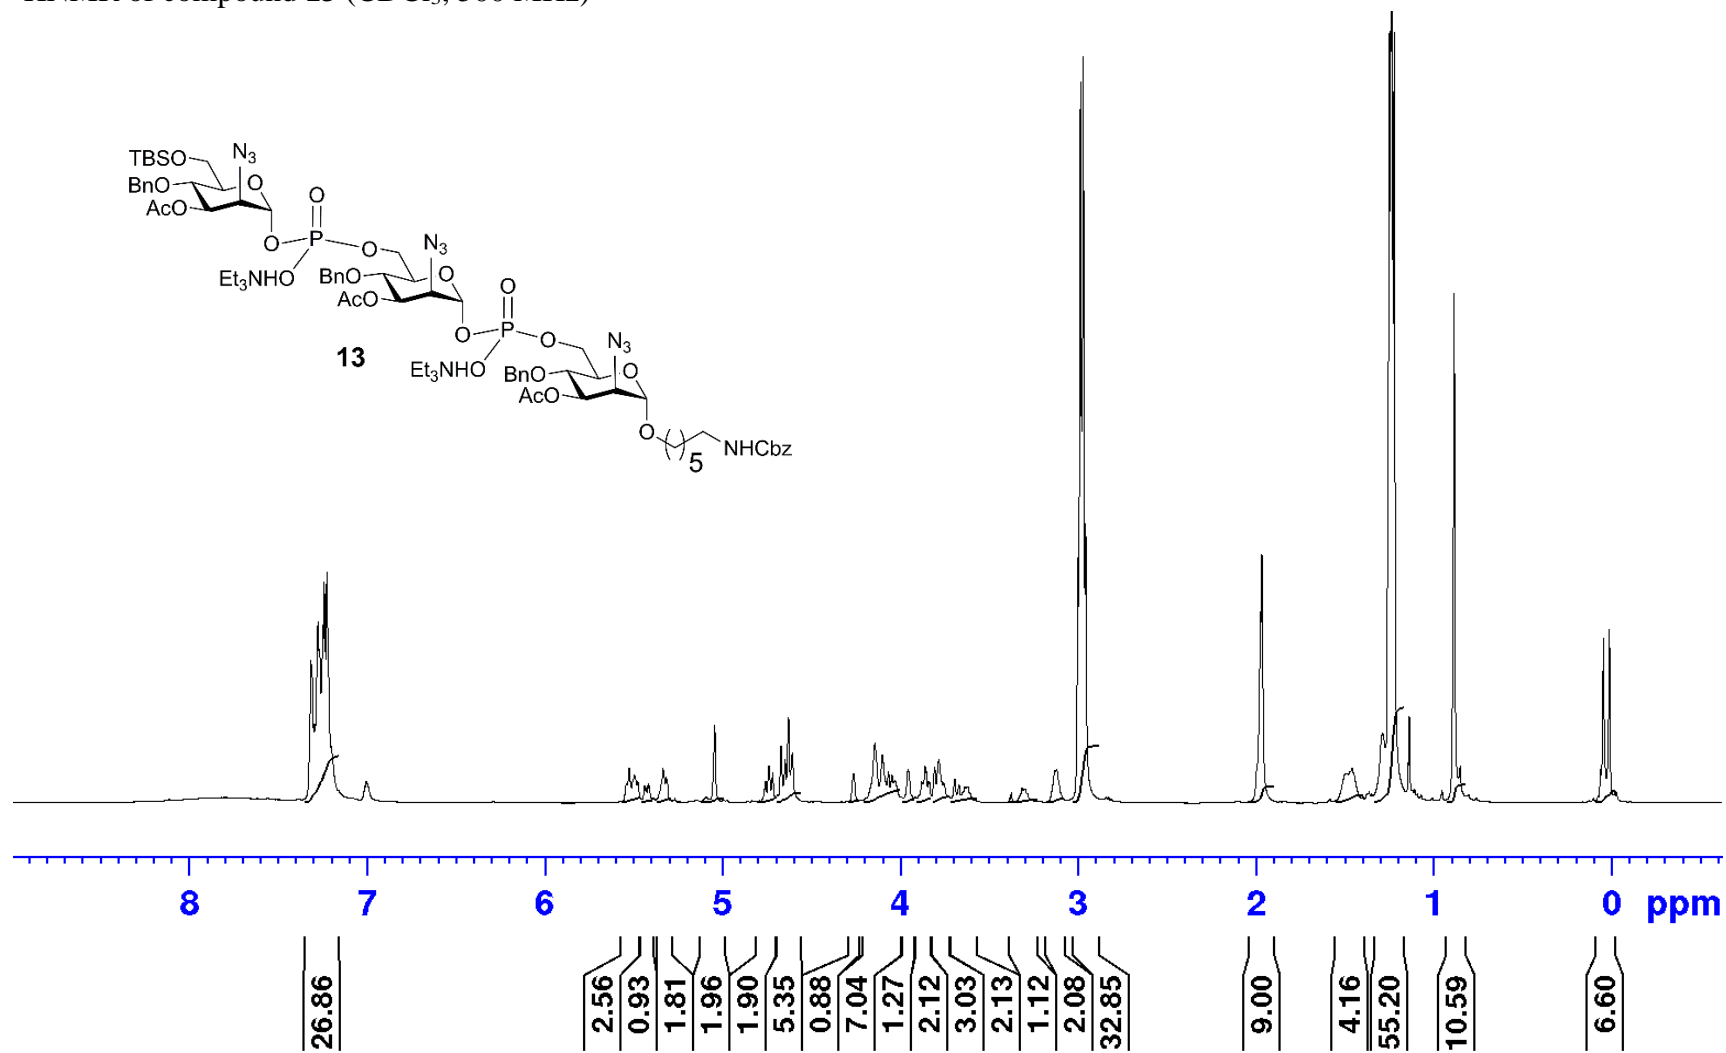

$^{13}\text{C}$  NMR of compound **13** ( $\text{CDCl}_3$ , 125 MHz)

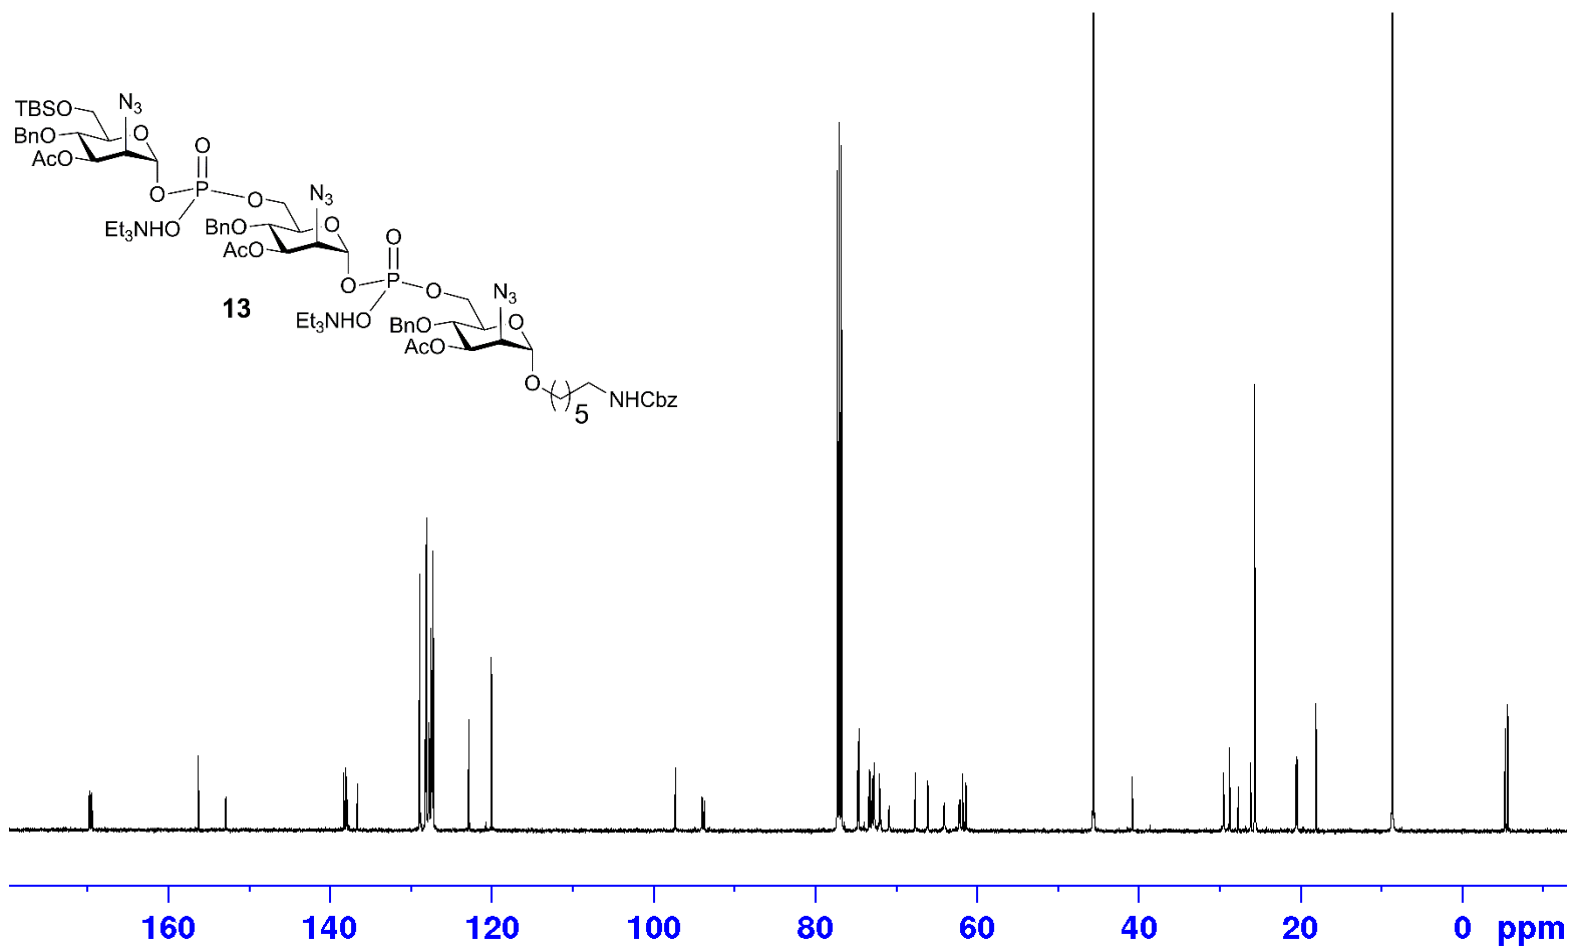



2D COSY of compound **13** (CDCl<sub>3</sub>, 500 MHz)

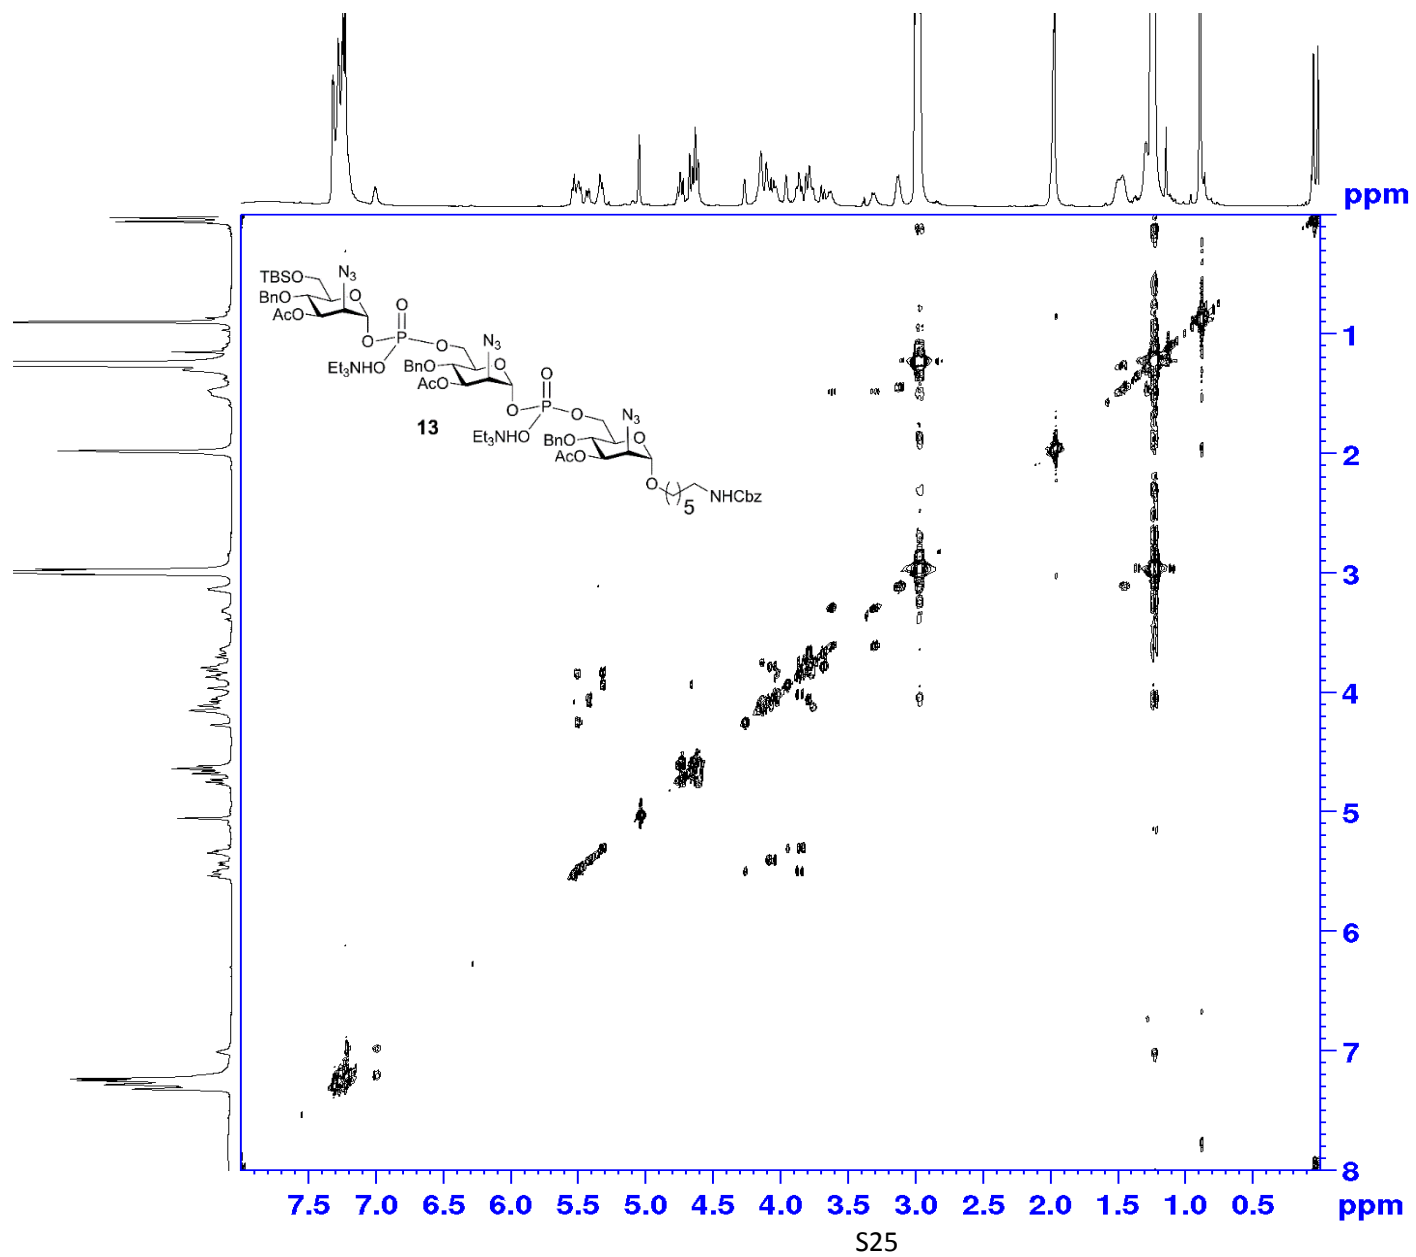

2D HSQC of compound **13** (CDCl<sub>3</sub>, 500 MHz)

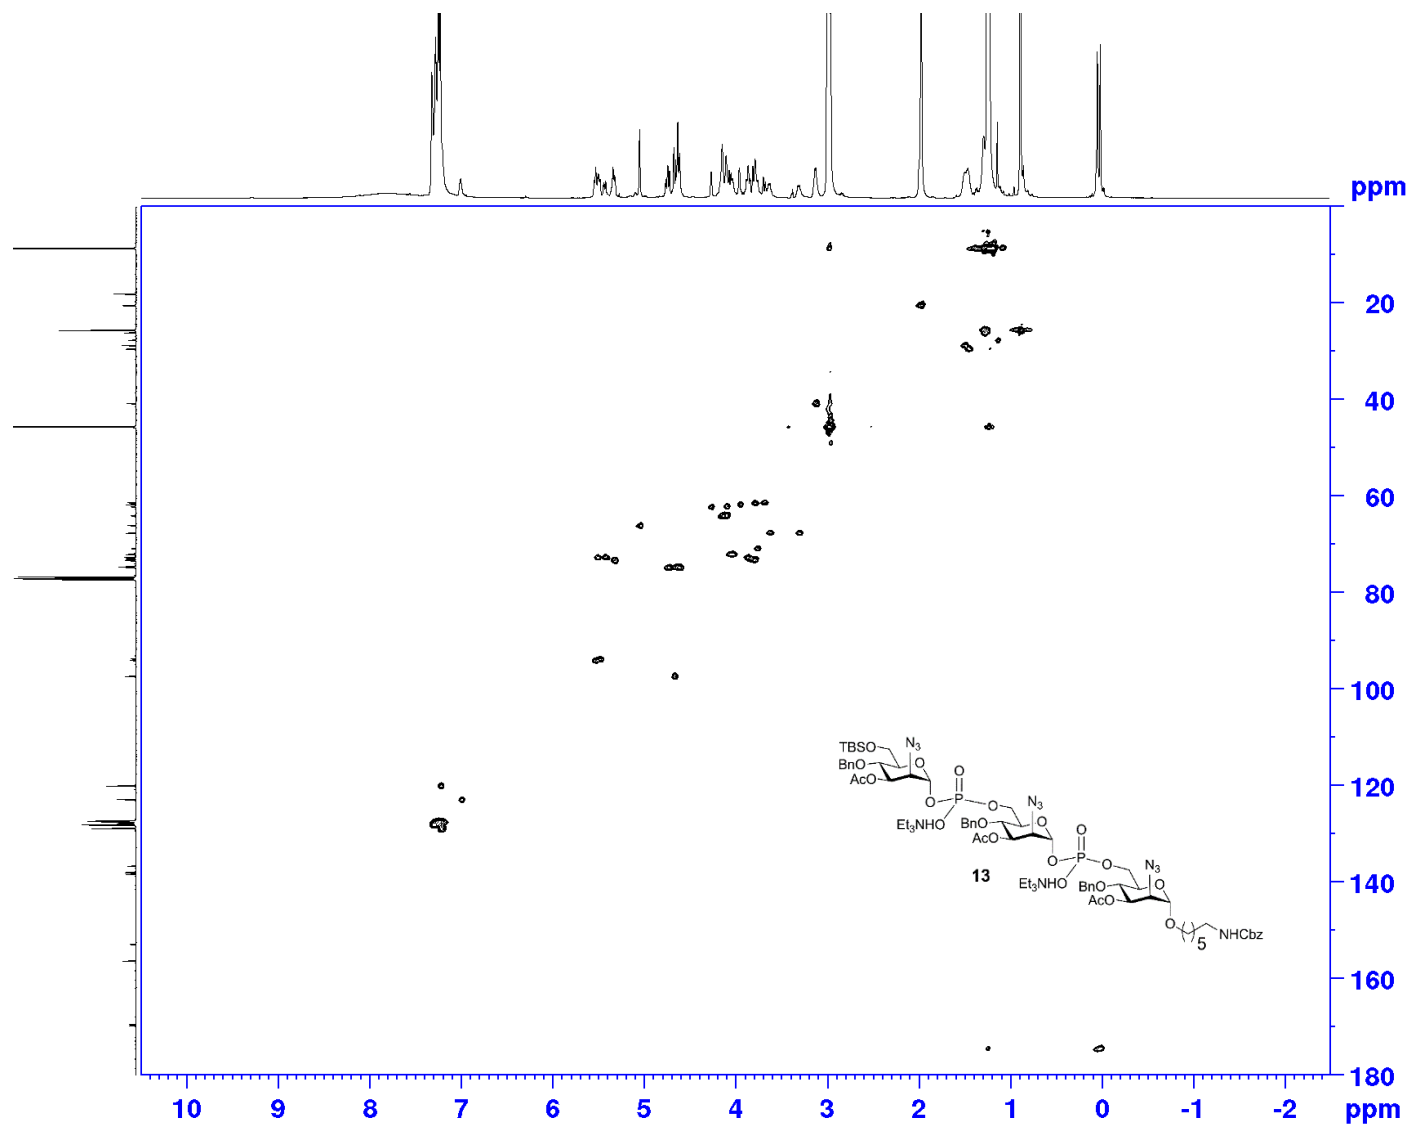

NHCbz

MALDI-TOF MS spectra of compound **13**

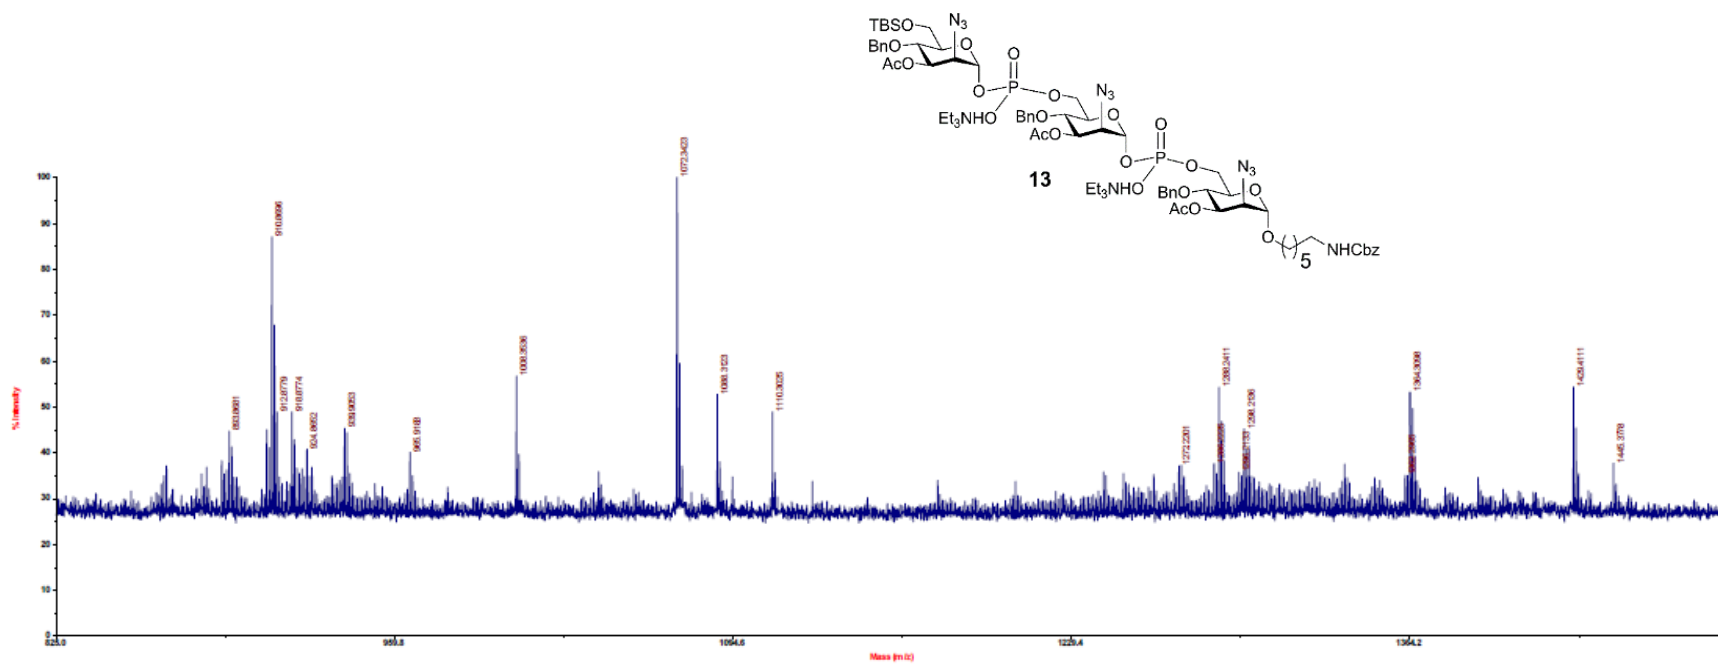

$^1\text{H}$ NMR of compound **14** ( $\text{CDCl}_3$ , 500 MHz)

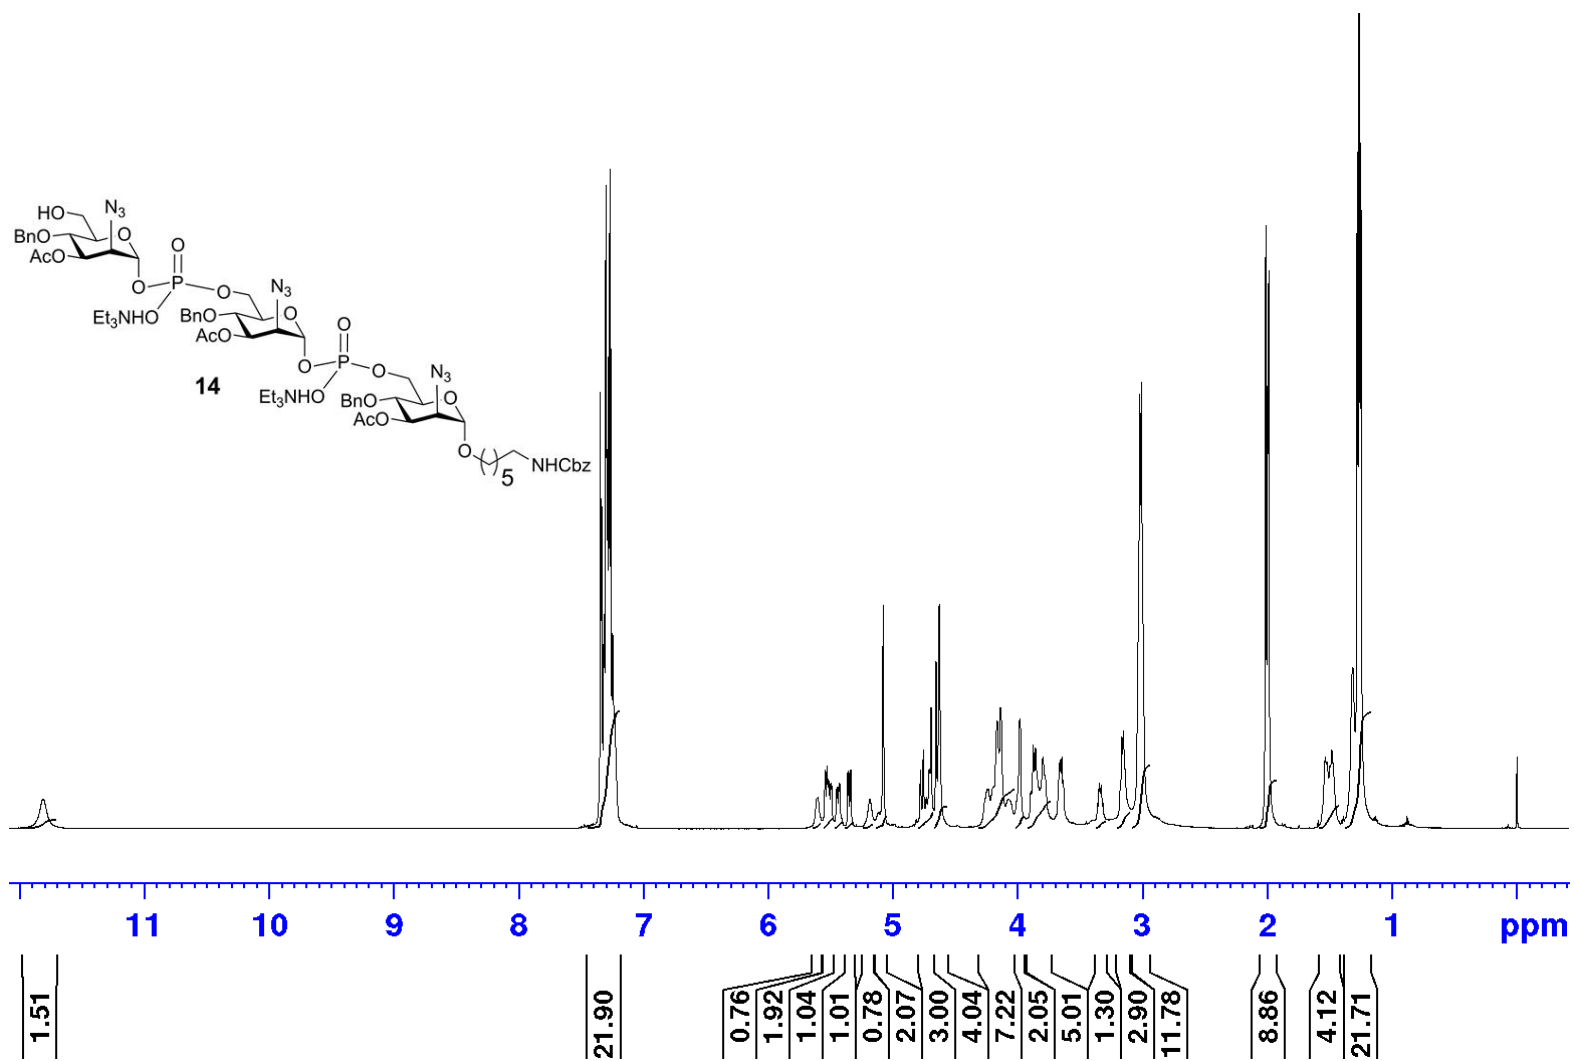

$^{13}\text{C}$  NMR of compound **14** ( $\text{CDCl}_3$ , 125 MHz)

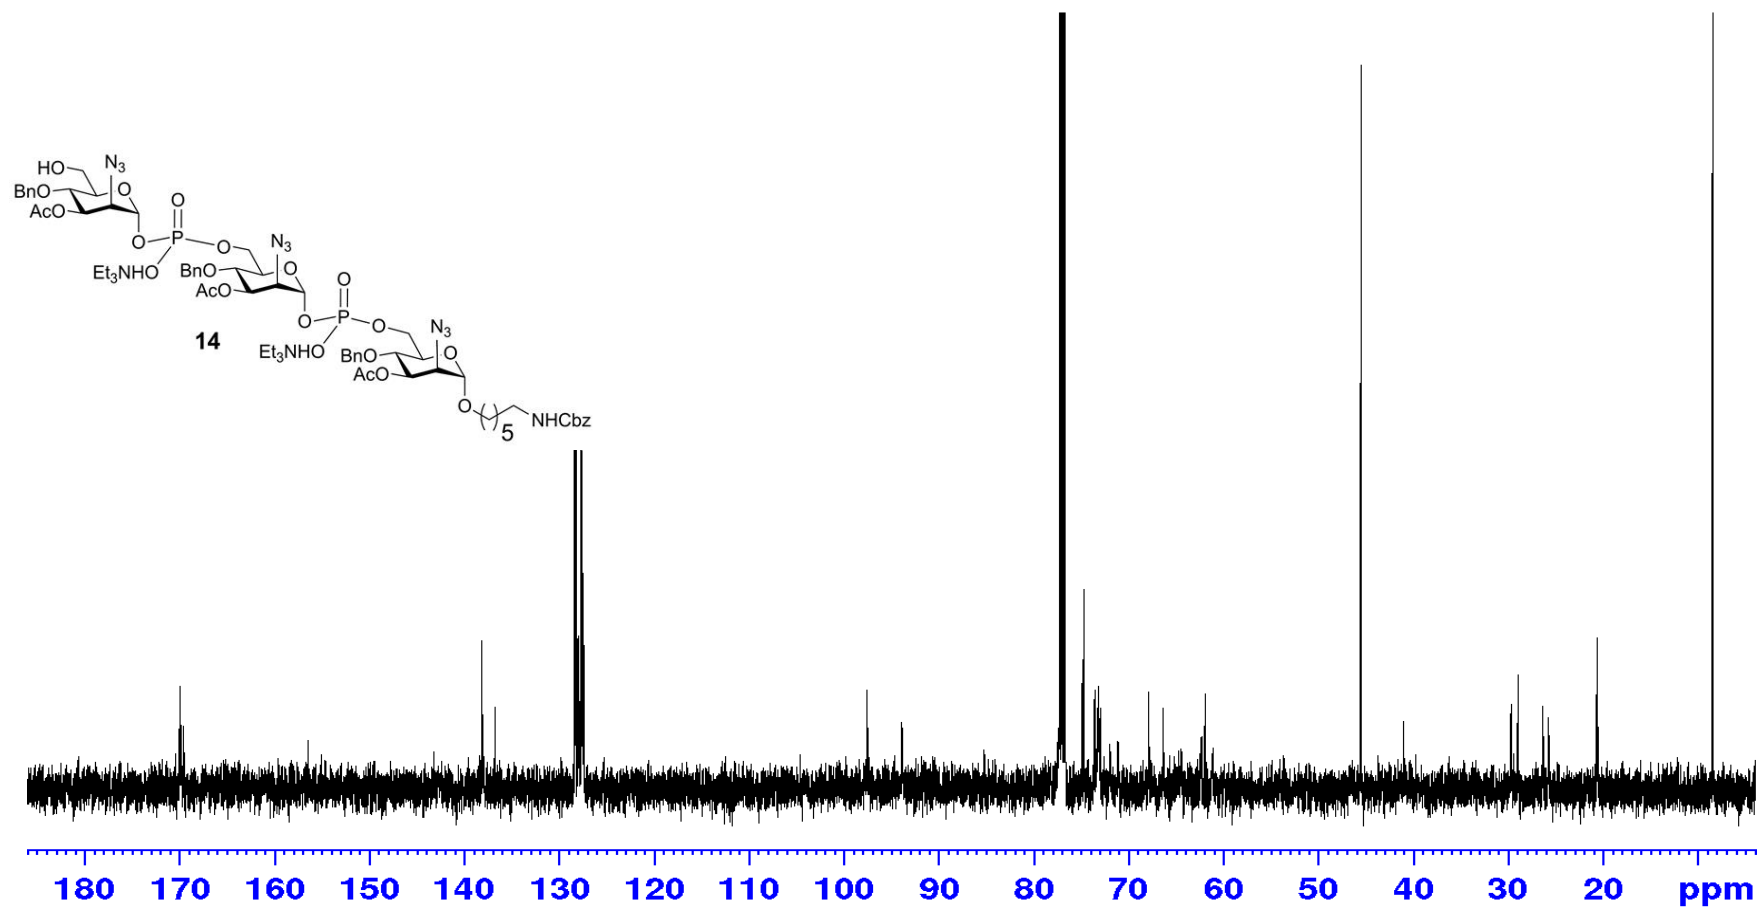

2D COSY of compound **14** (CDCl<sub>3</sub>, 500 MHz)

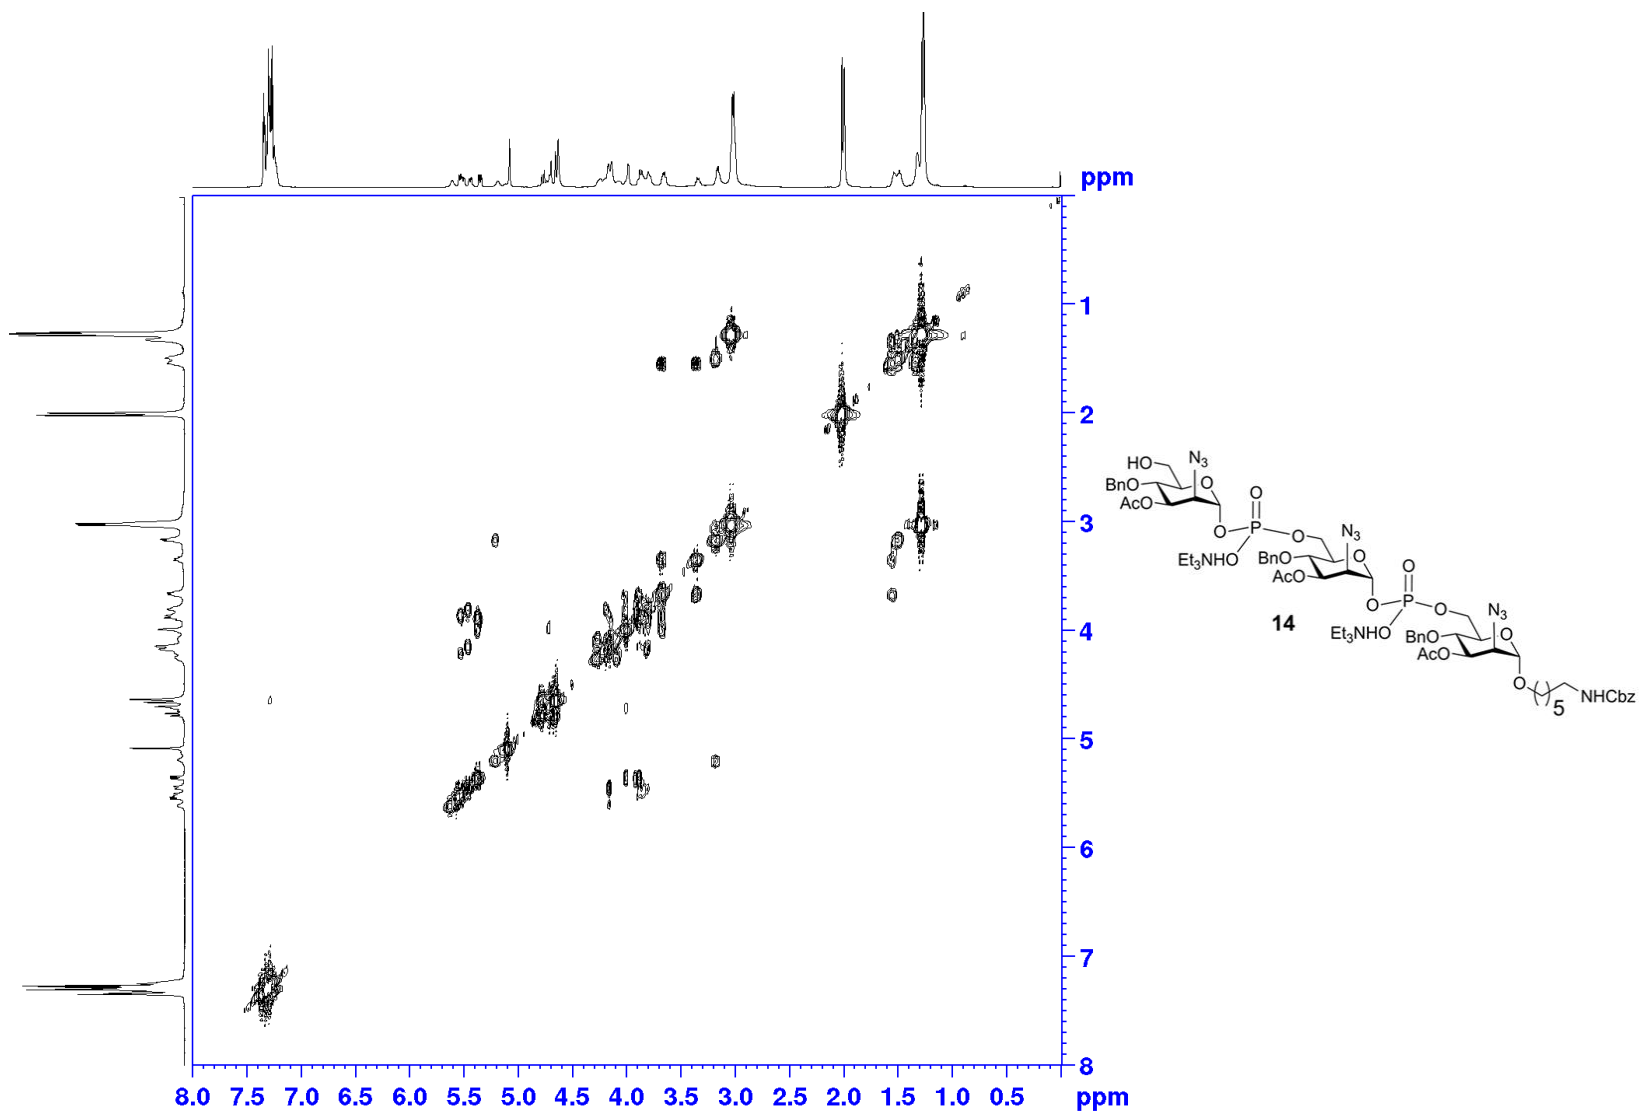

2D HSQC of compound **14** (CDCl<sub>3</sub>, 500 MHz)

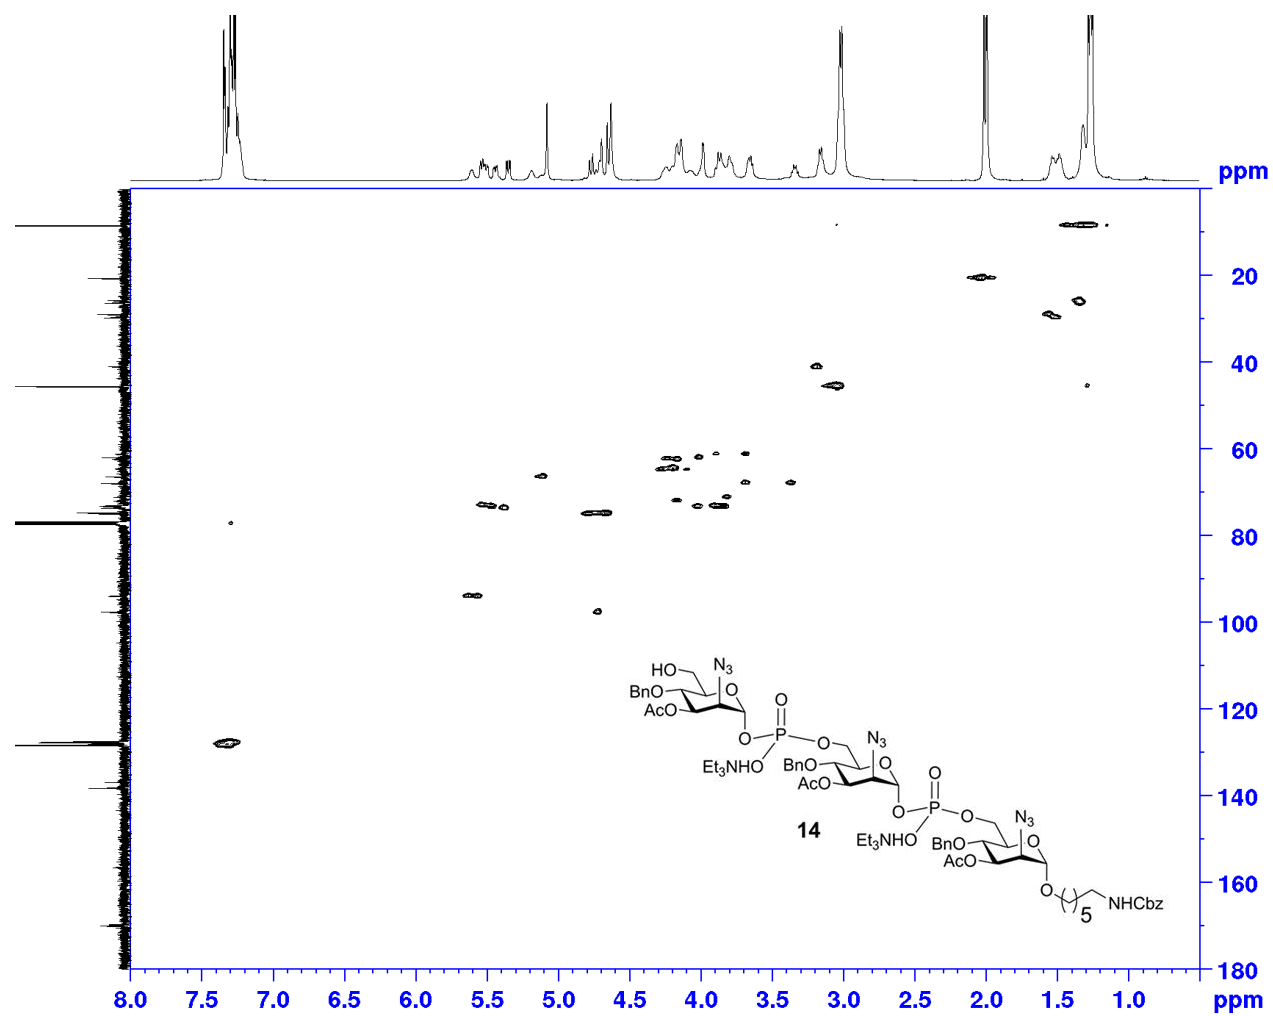

$^{31}\text{P}$  NMR of compound **14** ( $\text{CDCl}_3$ , 202 MHz)

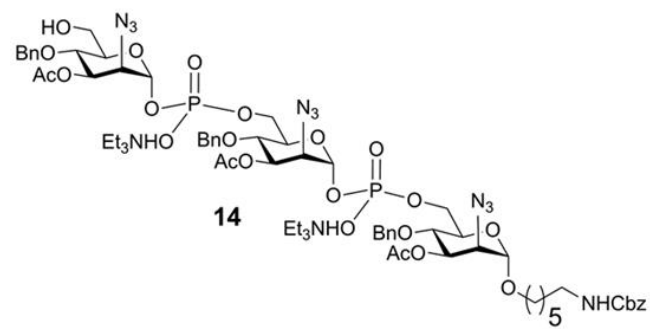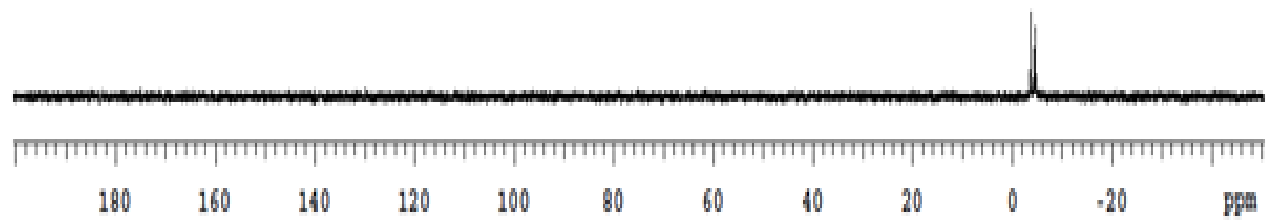



MALDI-TOF MS spectra of compound **14**

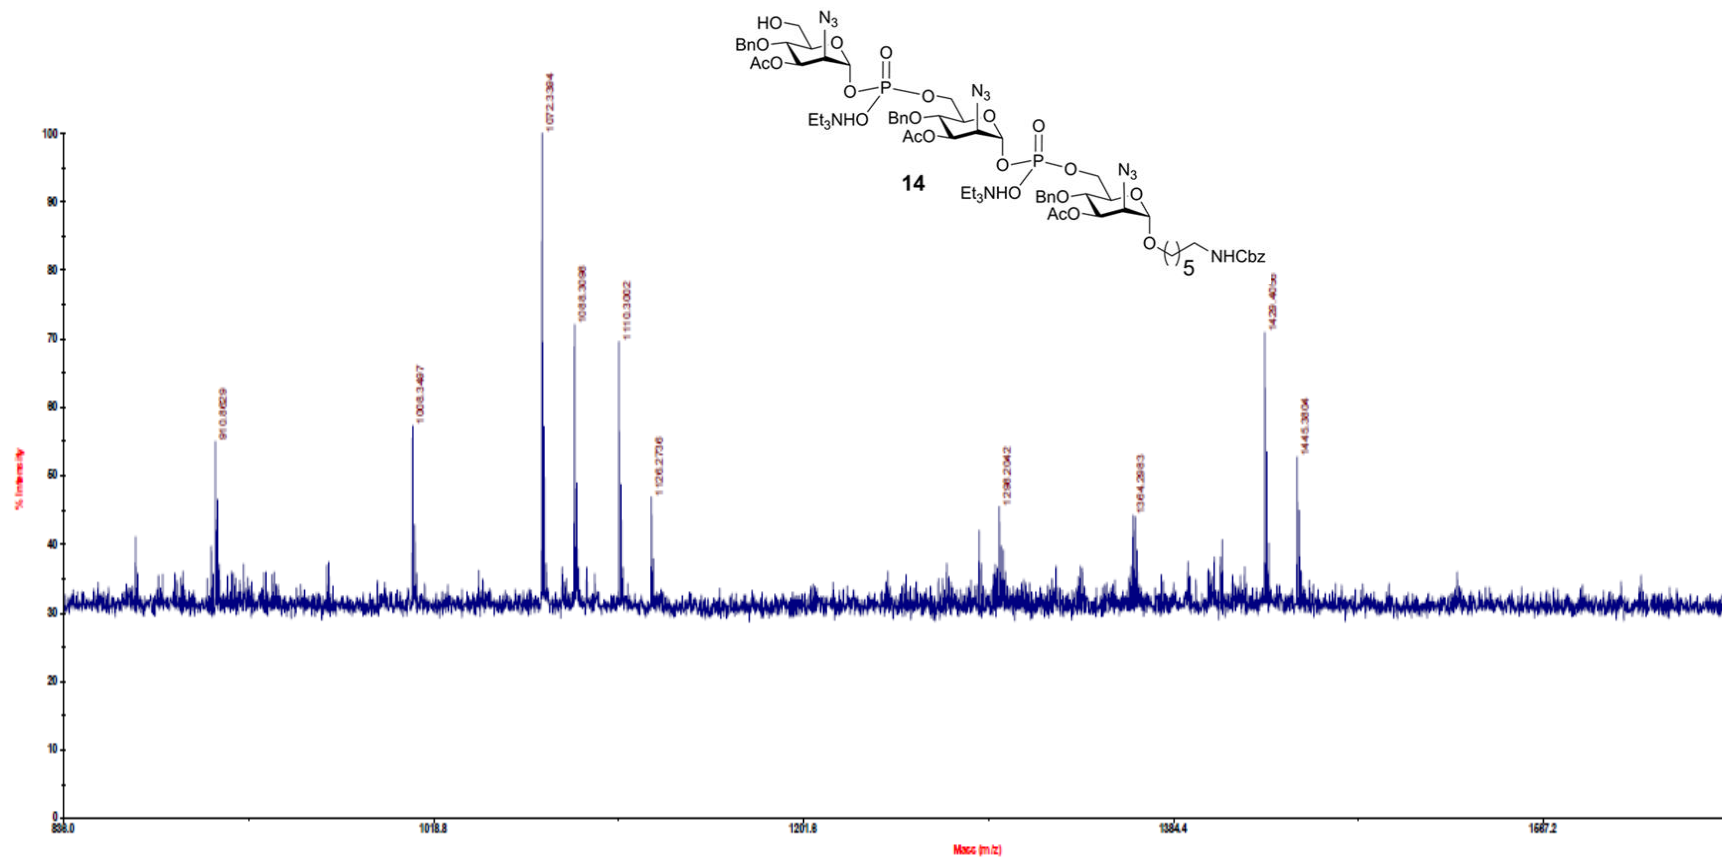

$^1\text{H}$ NMR of compound **15** ( $\text{CDCl}_3$ , 500 MHz)

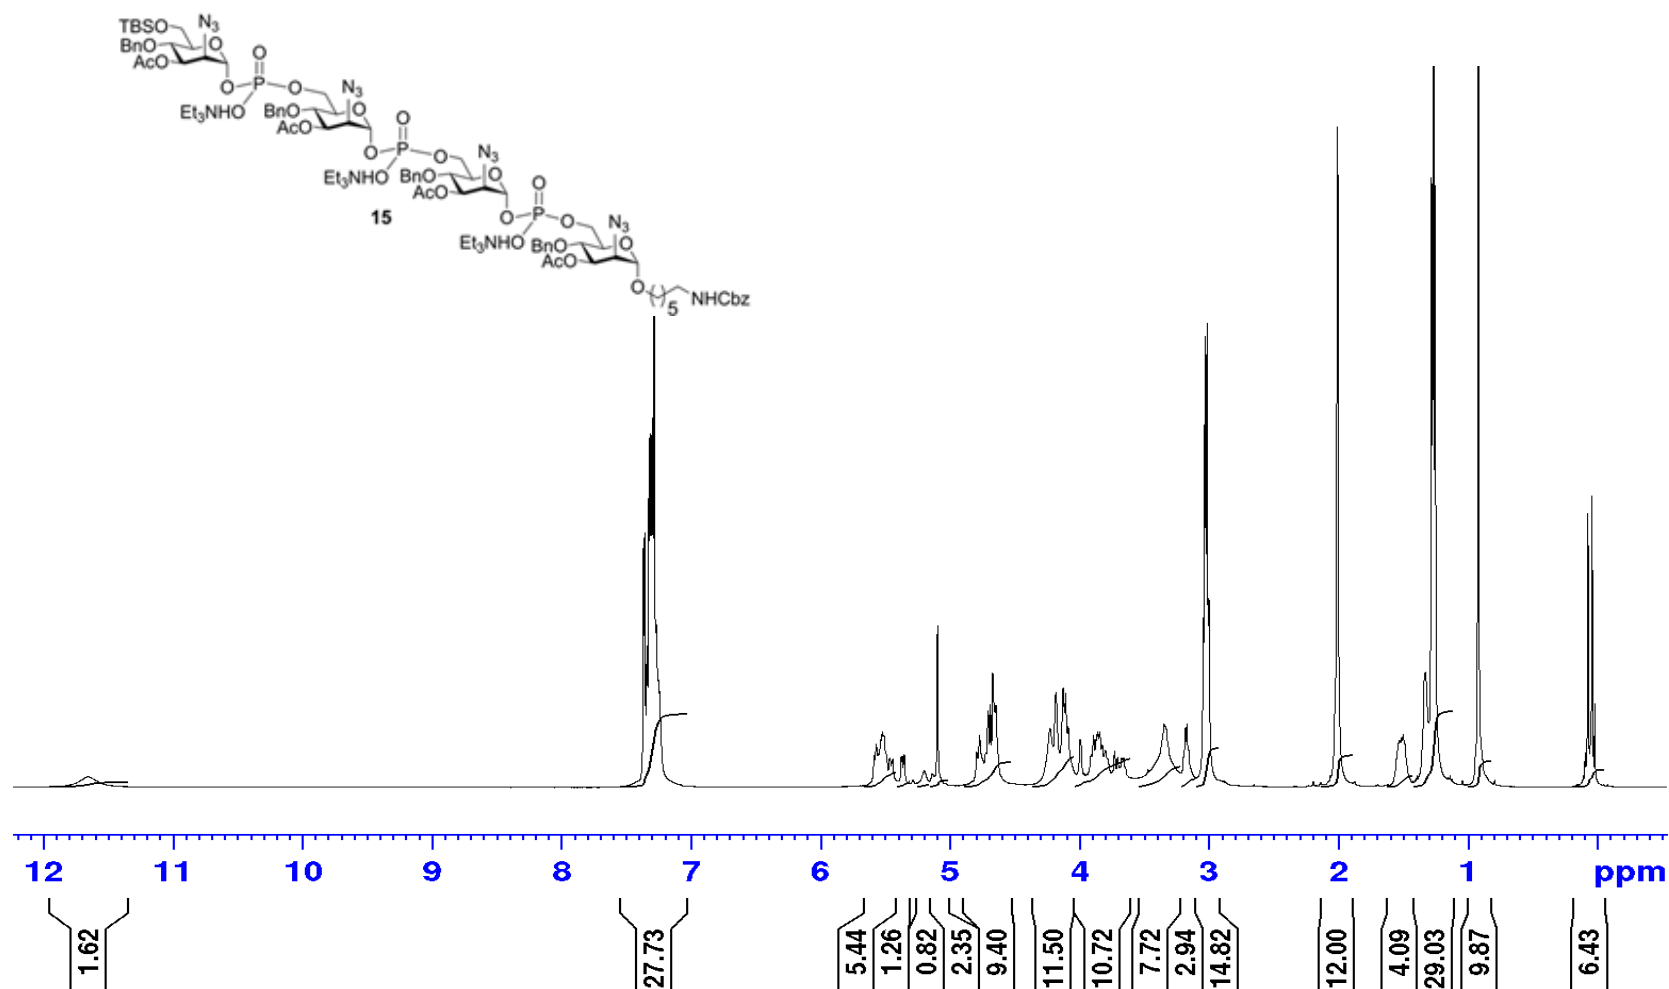

$^1\text{H}$ NMR of compound **15** ( $\text{CDCl}_3$ , 500 MHz)

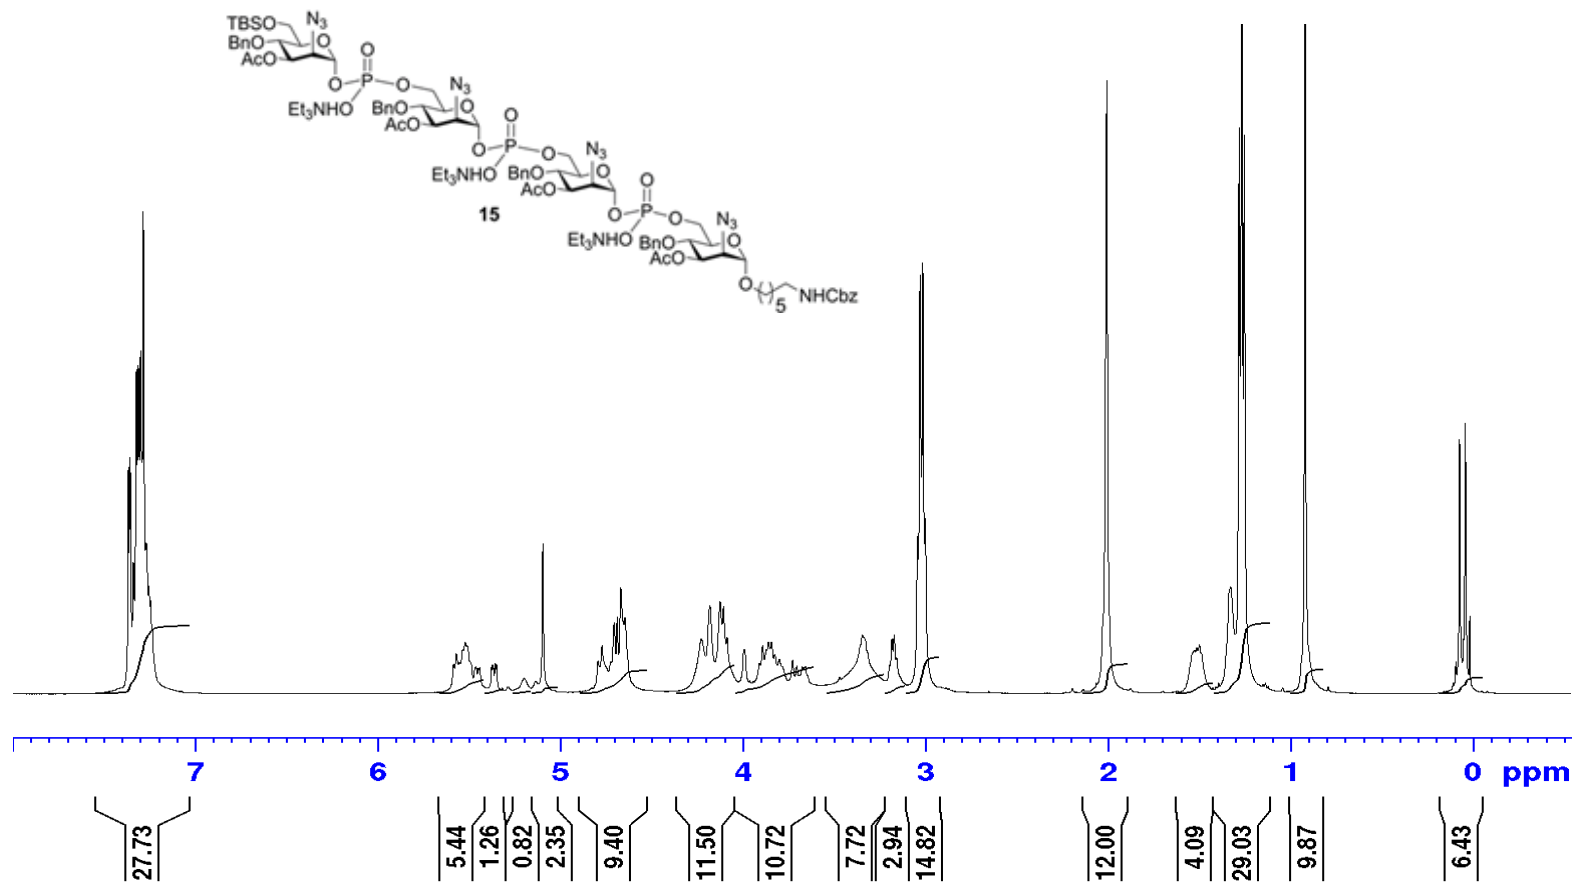

$^{13}\text{C}$  NMR of compound **15** ( $\text{CDCl}_3$ , 125 MHz)

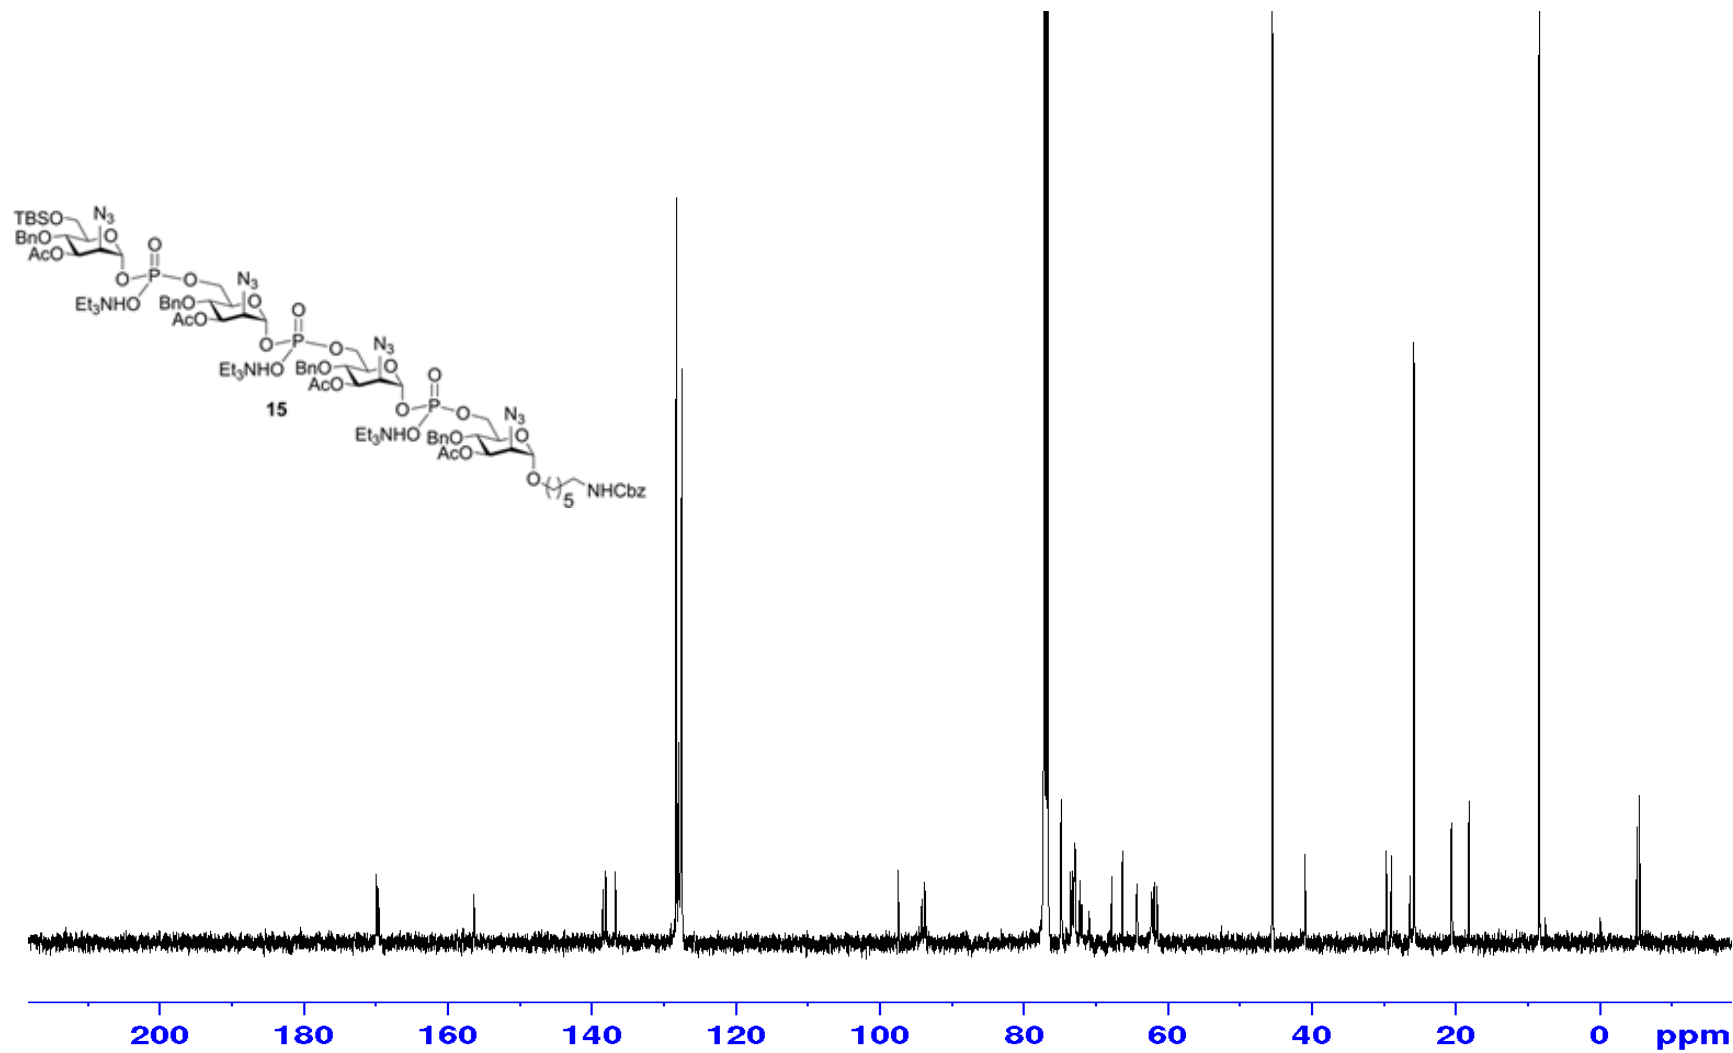

2D COSY of compound **15** (CDCl<sub>3</sub>, 500 MHz)

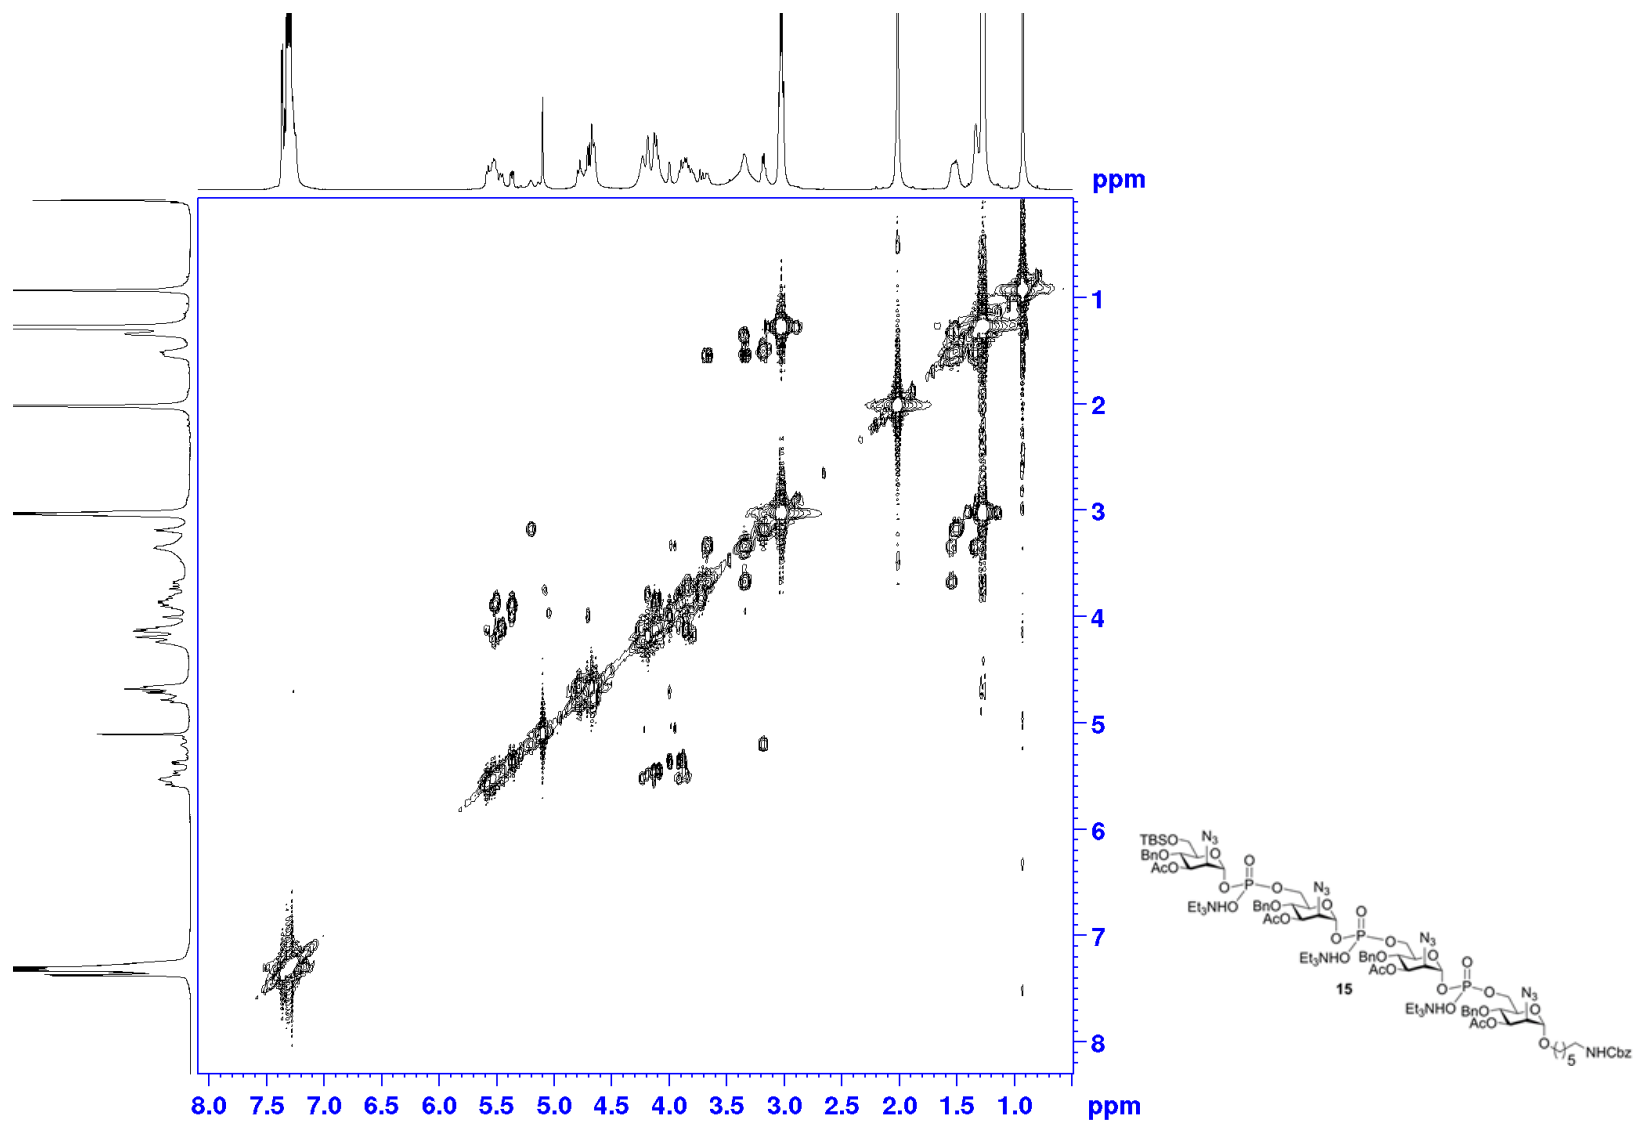

$^{31}\text{P}$  NMR of compound **15** ( $\text{CDCl}_3$ , 202 MHz)

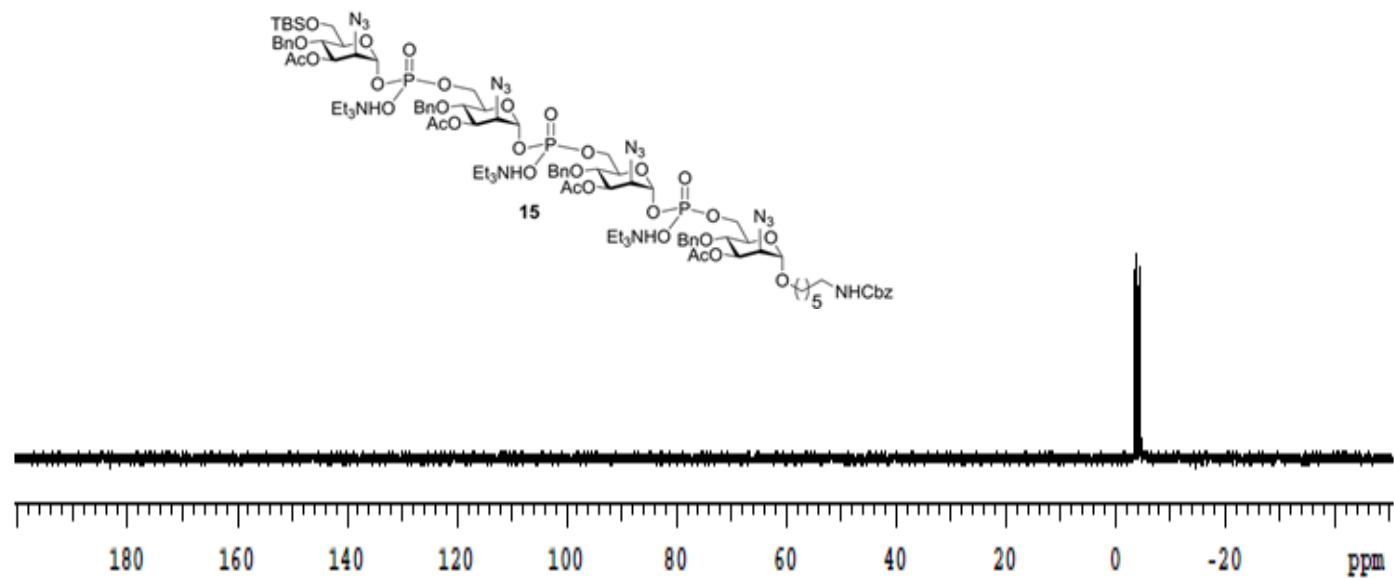

MALDI-TOF MS spectra of compound **15**

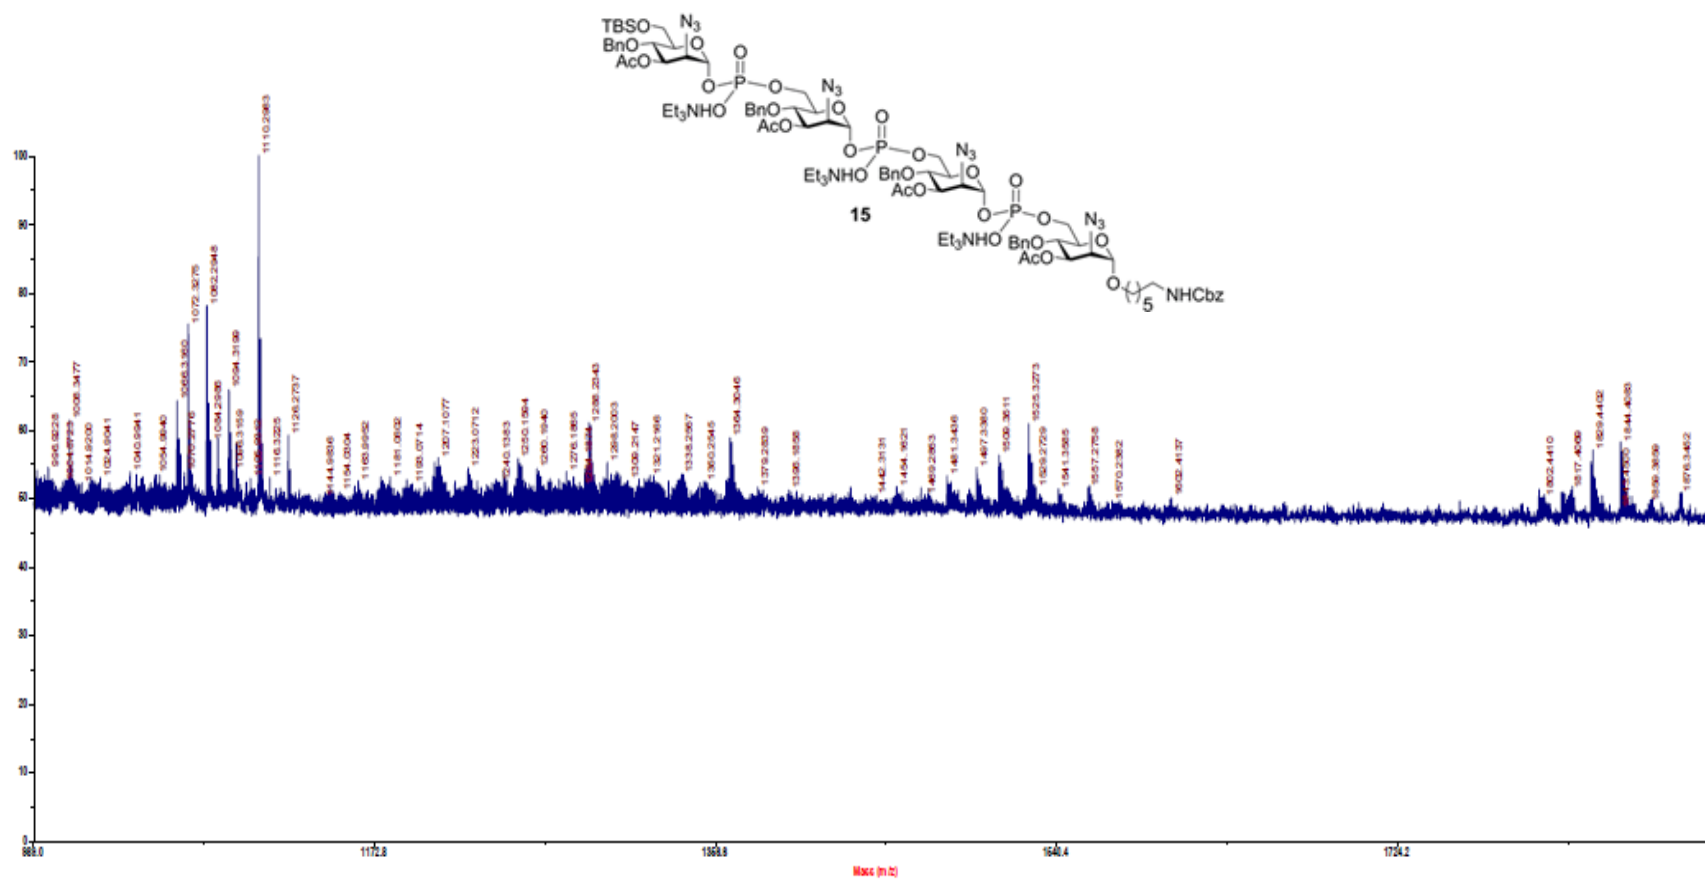

$^1\text{H}$  NMR of compound **1** ( $\text{D}_2\text{O}$ , 500 MHz)

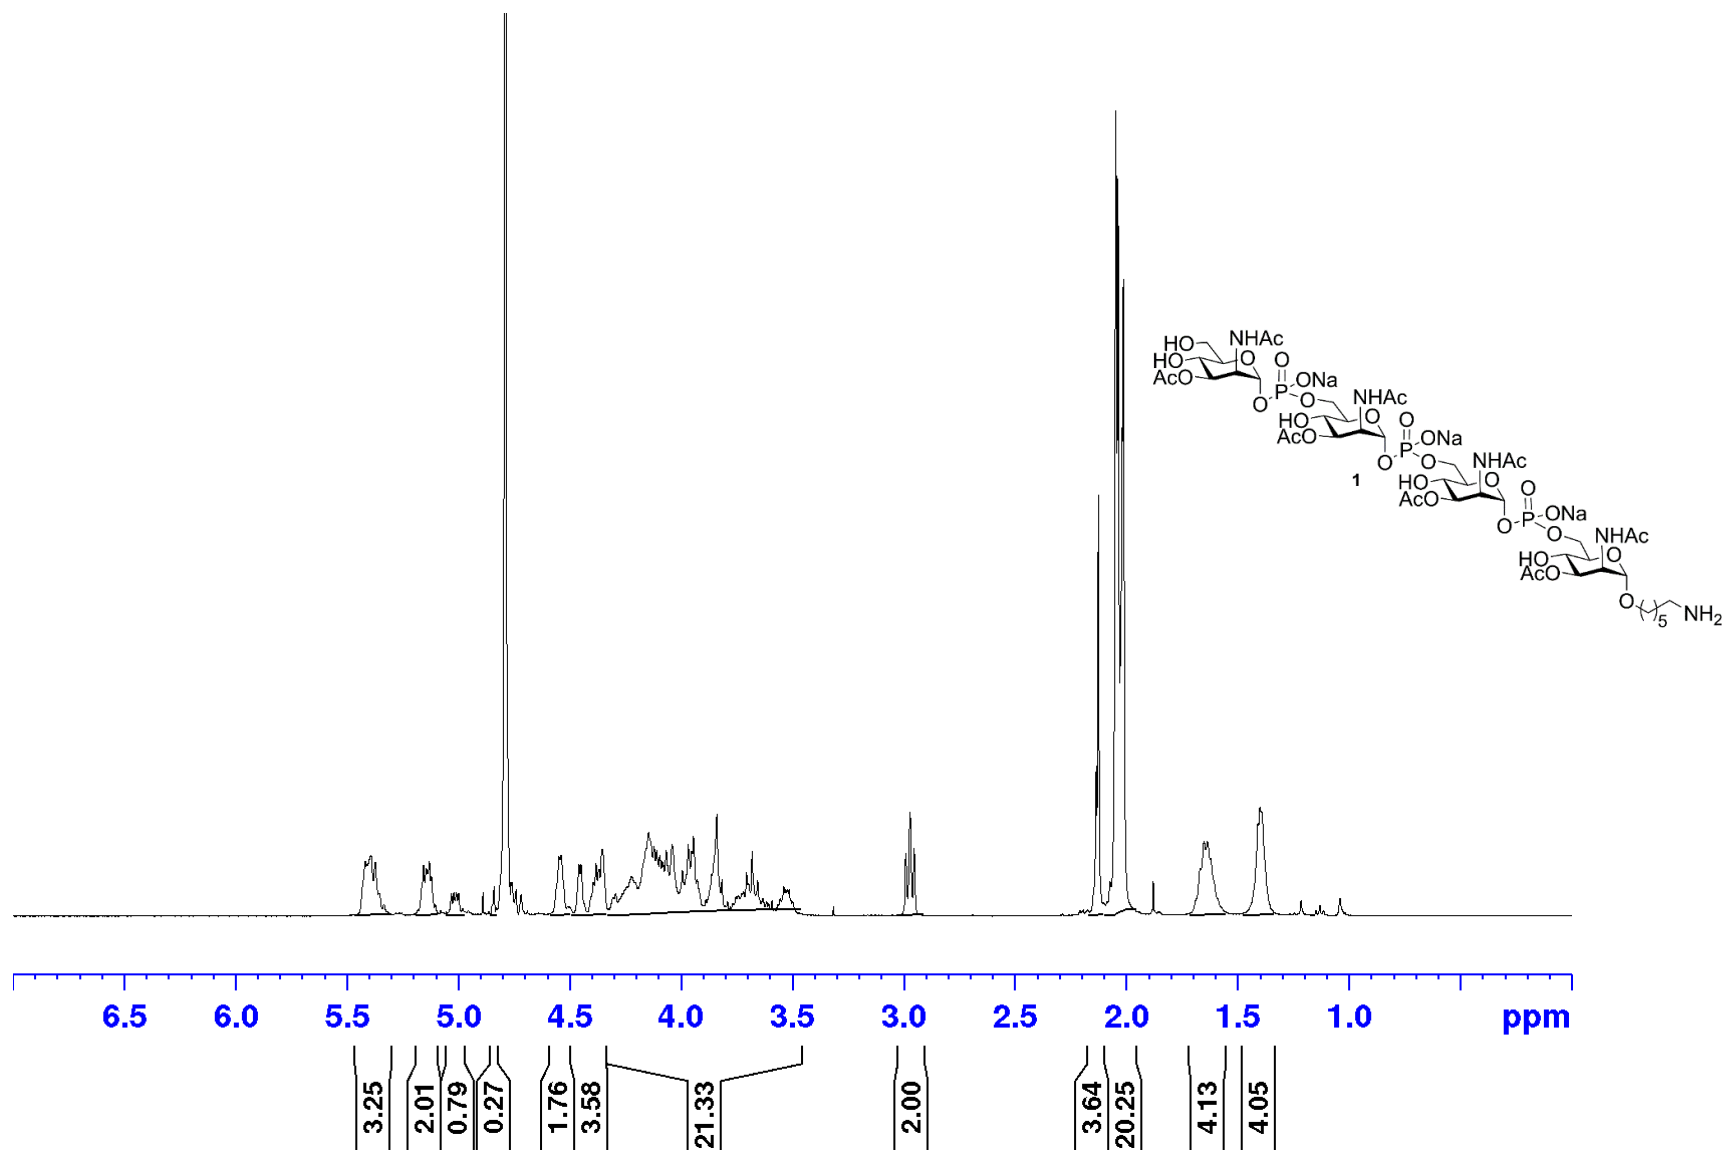



$^{13}\text{C}$  NMR of compound **1** ( $\text{D}_2\text{O}$ , 125 MHz)

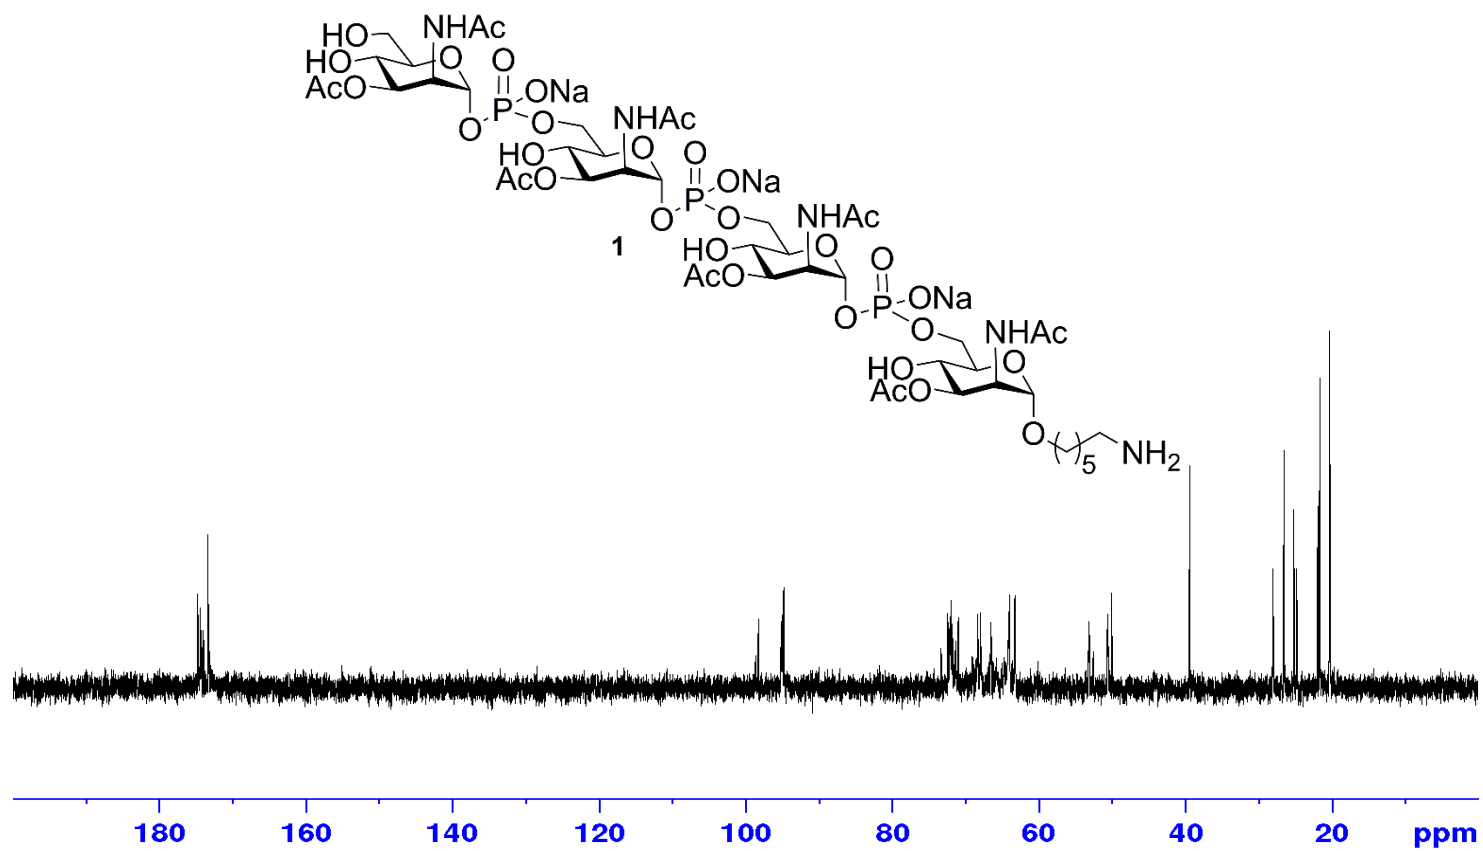

2D COSY NMR of compound **1** (D<sub>2</sub>O, 500 MHz)

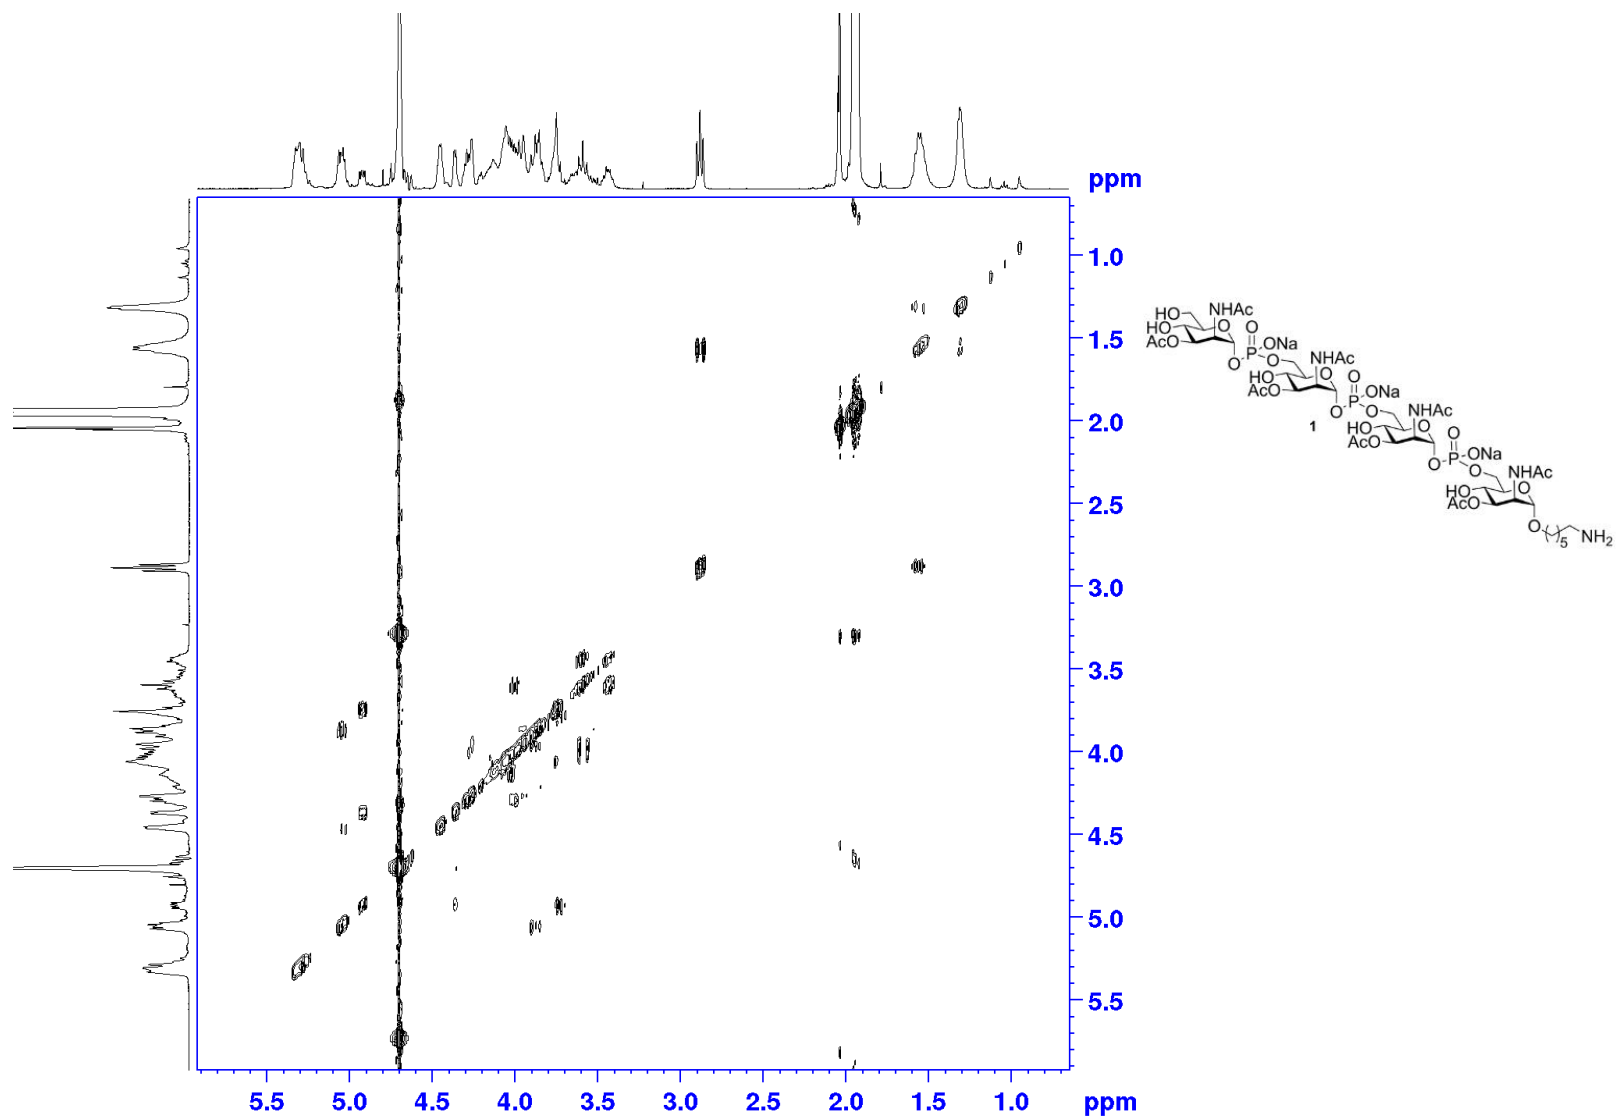

2D HSQC NMR of compound **1** (D<sub>2</sub>O, 500 MHz)

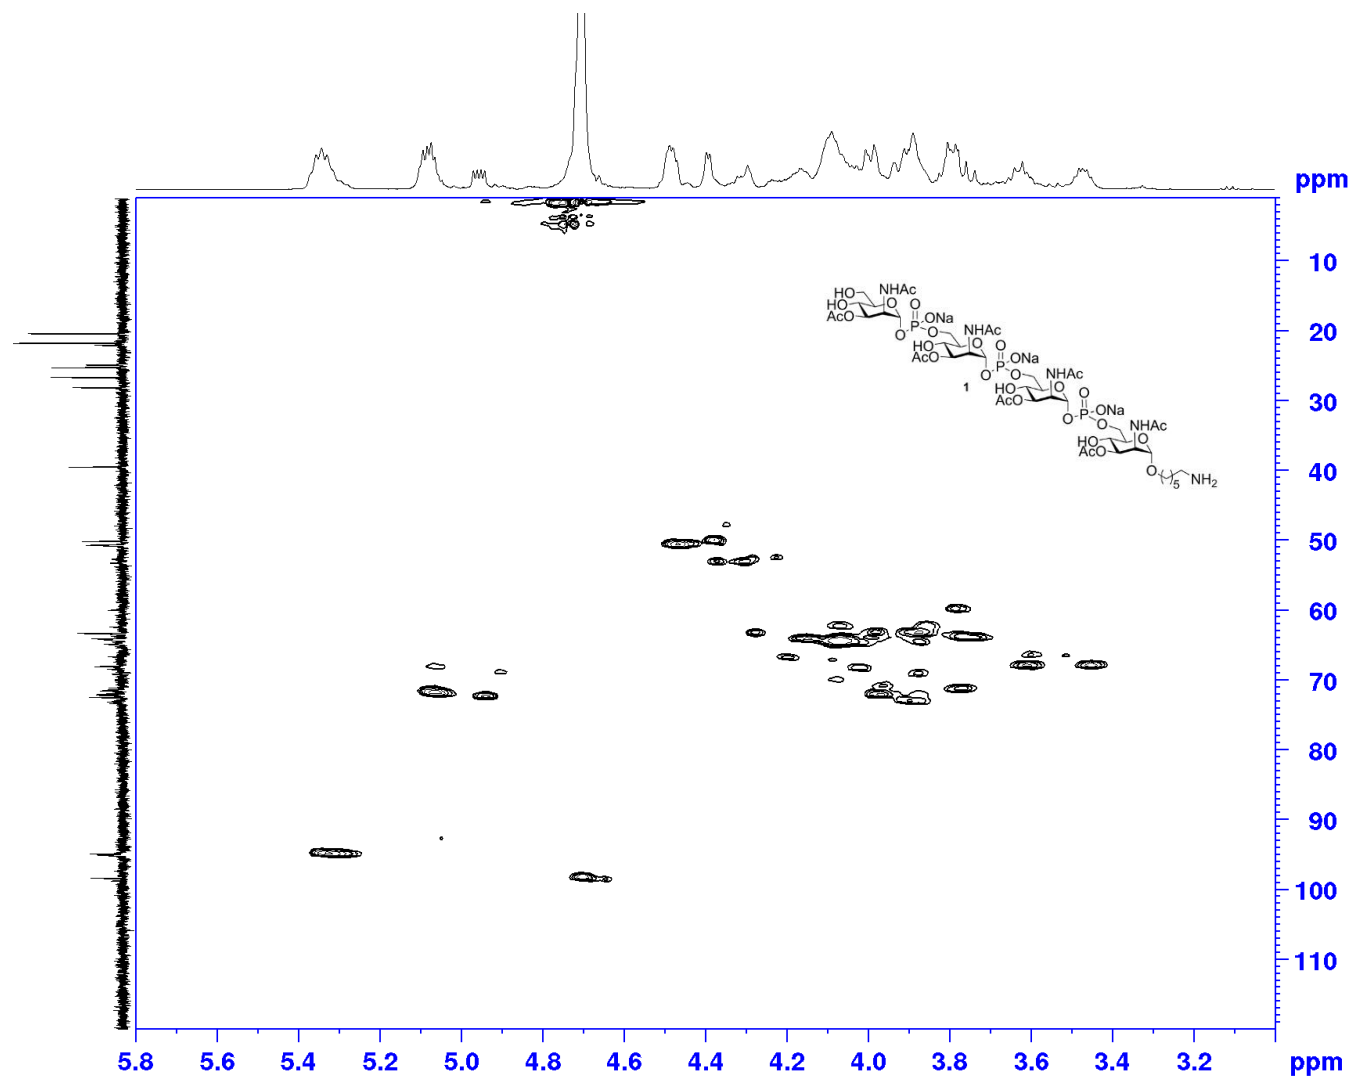

$^{31}\text{P}$  NMR of compound **1** ( $\text{D}_2\text{O}$ , 202 MHz)

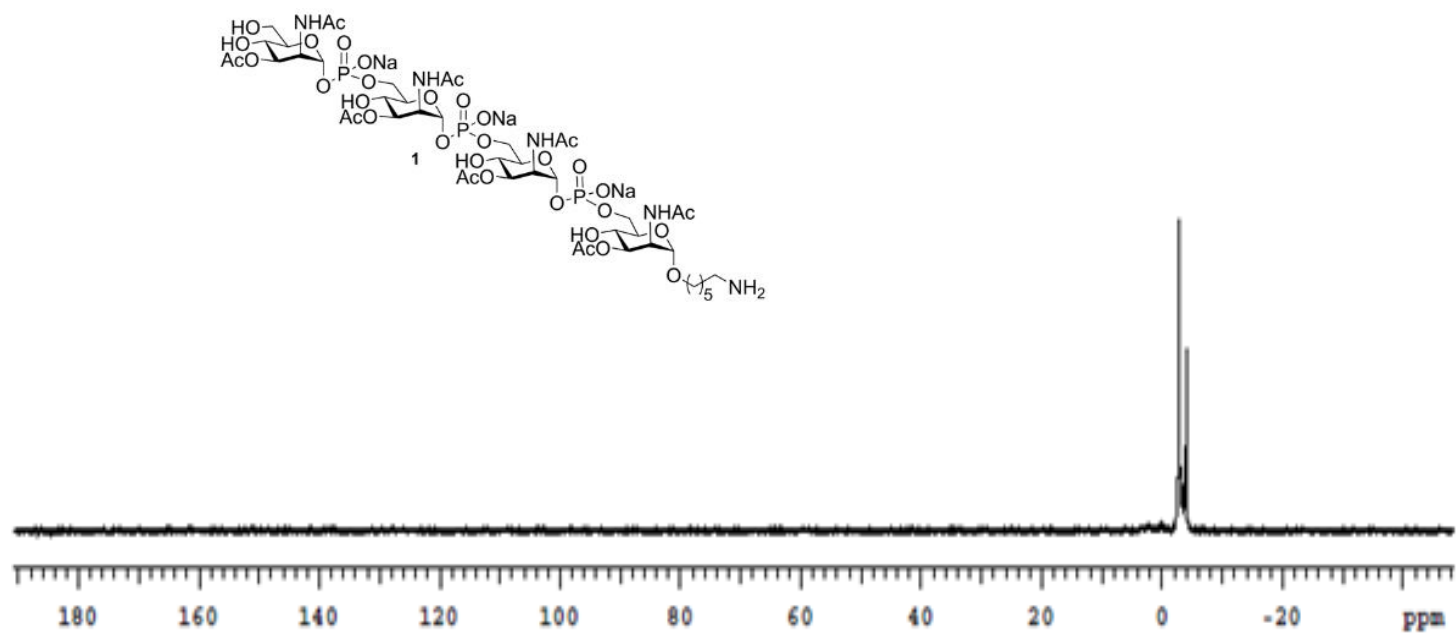

MALDI-TOF MS spectra of compound **1**

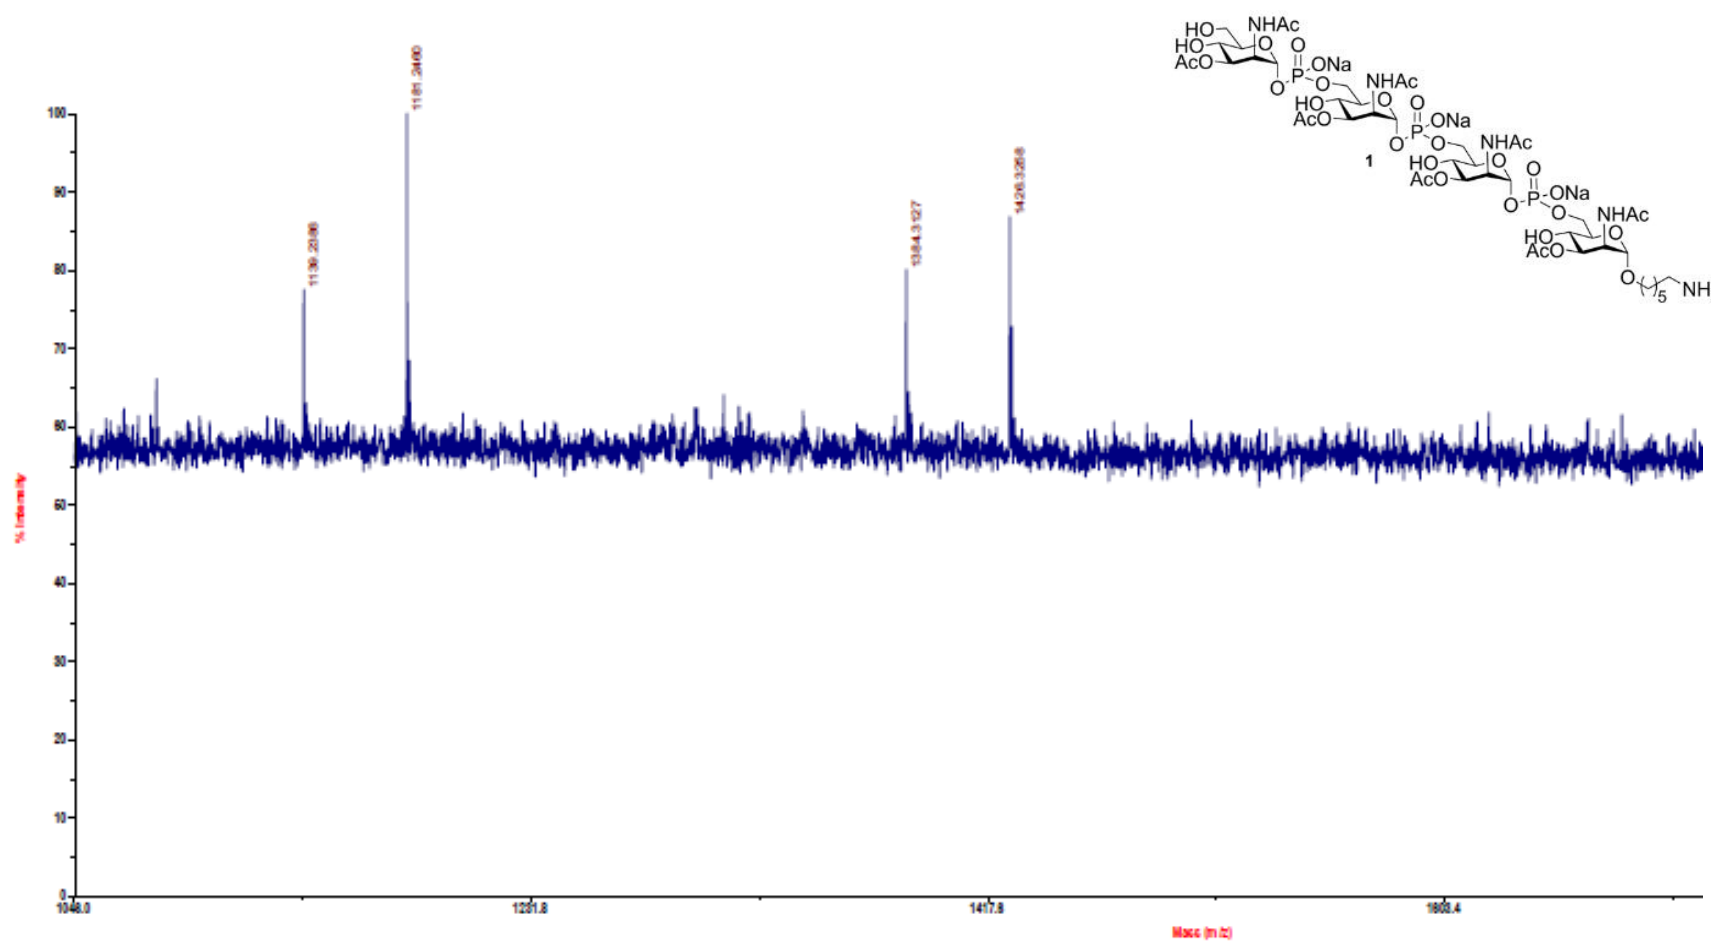

**Preparation of the compound 1 (MenA tetramer) and Compound 1-Tetanus toxoid (MenA tetramer-TT) conjugate:** To a solution of compound **1** (18 mg, 14.56 mmol) in 0.1 M HEPES buffer containing 0.15 M NaCl, 10 mM EDTA, pH 7.5, was added a solution of *S*-acetylthioglycolic acid *N*-hydroxysuccinimide ester (SATA) (10 mg, 43.7 mmol) in dimethyl sulfoxide (218  $\mu$ l) and the reaction mixture was stirred for 1 hour at room temperature. The resulting solution was purified by Sephadex G-10 chromatography to remove excess SATA. The resulting solution was reacted with hydroxylamine hydrochloride (35 mg, 35 equiv.) and solution was stirred at room temperature for 2 hours and stored at  $-20\text{ }^{\circ}\text{C}$  (13 mg, 70%) and used within 48 hours.

A solution of Tetanus toxoid (20 mg/mL) in 0.1 M HEPES, pH 7.6 was added to a solution of 3-(maleimido) propionic acid *N*-hydroxysuccinimide ester (7.2 mg) in 1-Methyl-2-pyrrolidinone (135  $\mu$ l) and the reaction mixture was stirred for 2 hour at room temperature. The resulting solution was diafiltered against 0.1 M PBS containing 0.15 M NaCl, 5 mM EDTA, pH 6.8 through 50 kD cutoff membrane leading to a recovery of 16 mg (80%) modified TT.

A solution of thiolated oligosaccharide (13 mg) in buffer containing 0.1 M HEPES, 0.15 M NaCl, 10 mM EDTA, pH 7.5, was mixed with a solution of maleimide linked tetanus toxoid (10 mg) in 0.1 M PBS, 0.15 M NaCl, 5 mM EDTA, pH 6.8. The resulting solution was gently stirred overnight at  $4\text{ }^{\circ}\text{C}$ . At the end of the reaction, solution was diafiltered against buffer containing 0.1 M MES, 0.2 M NaCl, pH 6.5 through 50 kD cutoff membrane to achieve purified compound **1**-TT conjugate (5.5 mg conjugated compound **1** in the compound **1**-TT conjugate).
